# Supplementary material for: Characterization of a thaumarchaeal symbiont that drives incomplete nitrification in the tropical sponge Ianthella basta
Source: bioRxiv or medRxiv preprint supplement (doi:10.1101/527234), 2019-01-23
Supplement: Supplementary file [file media-1.pdf]

# Supplementary Information

## Characterization of a thaumarchaeal symbiont that drives incomplete nitrification in the tropical sponge *Ianthella basta*

5 Florian U. Moeller, Nicole S. Webster, Craig W. Herbold, Faris Behnam, Daryl Domman, Mads  
Albertsen, Maria Mooshammer<sup>1</sup>, Stephanie Markert, Dmitrij Turaev, Dörte Becher, Thomas Rattei,  
Thomas Schweder, Andreas Richter, Margarete Watzka, Per Halkjaer Nielsen, and Michael Wagner

### Table of contents:

10

1. Supplementary Results and Discussion
2. Supplementary Experimental Procedures
3. Figures S1 – S7
4. Table S1-S5

15 5. References

### Supplementary Results and Discussion

20 **High GC content of *Ca. Nitrosospongia bastadiensis*.** Both thaumarchaeal symbiont MAGs from  
*I. basta* possess the highest GC content (64.8%) of any genome-sequenced thaumarchaeote (Fig.  
2C). While the GC content in the genome of *Ca. Cenarchaeum symbiosum* is similarly high  
(57.4%), the thaumarchaeal MAGs from the sponges *Cymbastela concentrica* (Moitinho-Silva *et*  
*al.*, 2017a) and a glass sponge (Tian *et al.*, 2016) had a much lower GC content (Fig. 2C). The high  
25 GC content found in the *I. basta* thaumarchaeal symbiont is consistent with the high GC content

evident in Mediterranean sponge metagenomes (GC content 58-63%), particularly when compared to seawater metagenomes (GC content 41%) collected at the same location (Horn *et al.*, 2016). Similarly, the GC content of six sponge microbiome metagenomes (Fan *et al.*, 2012) that we queried had an average GC content of  $57.8\% \pm 6.7(\text{SD})$ , with three great barrier reef sponge species having an average microbiome metagenomic GC content of  $63.3\% \pm 2.2 (\text{SD})$ . In contrast, the average GC composition of selected marine and coral microbiomes are ~48% and ~45%, respectively (Reichenberger *et al.*, 2015). While several environmental factors are thought to affect the genomic GC content of bacteria and archaea (Foerstner *et al.*, 2005; Wang *et al.*, 2006), increased rates of homologous recombination via GC-biased gene conversion has recently been proposed as a crucial factor universally influencing the nucleotide content of microbial genes and genomes (Lassalle *et al.*, 2015). The possibility that sponge microbiomes are hot spots for input of novel genetic material via lateral gene transfer events (Fan *et al.*, 2012; Horn *et al.*, 2016), and also display increased homologous recombination rates should be assessed in future work.

**Environmental distribution of *Ca. Nitrosospongia bastadiensis*.** The *Ca. N. bastadiensis* 16S rRNA gene was queried against the Sponge Microbiome Project (SMP) database containing amplicon data sets from 268 sponge species including *I. basta* (Moitinho-Silva *et al.*, 2017b). The top hits were inserted into our reference 16S rRNA gene tree (Fig. 2A) using the Evolutionary Placement Algorithm (EPA; Berger *et al.*, 2011). 76 OTUs placed adjacent to the sponge-specific sequence cluster 174, including one with 100% identity to *Ca. N. bastadiensis*. These 76 OTUs comprised, on average,  $17.2\% \pm 7.1 (\text{SD})$  of all reads obtained from *I. basta* individuals in the SMP dataset, consistent with abundances determined by FISH and qPCR (see main text). Interestingly, the *Ca. N. bastadiensis*-adjacent OTUs were also found to comprise 0.25 – 7.5% of the total reads obtained from *Ancorina alata*, *Stellata maori*, *Stellata aremaria* sampled in New Zealand and *Xestospongia exigua* sampled on the Great Barrier Reef. In *X. exigua*, one low abundance OTU (0.17% of all reads) had 100% nucleotide identity with the V4 region of the *Ca. N. bastadiensis* 16S

rRNA gene. Among all environmental samples covered by the EMP, sequences highly similar or identical to *Ca. N. bastadiensis*, with abundances above 0.1%, were exclusively found in sponges. Consistent with a habitat restricted to a few sponge species, no hits above 97.6% similarity to the  
55 16S rRNA gene of *Ca. N. bastadiensis* were detected by the Integrated Microbial NGS platform that queries most publicly available 16S rRNA gene amplicon data sets (but not the SMP dataset) (Lagkouvardos *et al.*, 2016).

**Eukaryotic-like proteins (ELPs) in *Ca. Nitrosospongia bastadiensis*.** Four types of ELPs are  
60 found in *Ca. N. bastadiensis*: Proteins with tetratricopeptide repeats (TPR), the Toll-interleukin-1 receptor (TIR) -like domain PF08937 (DUF1863; Cort *et al.*, 2000), immunoglobulin-like (Ig-like) domains (DUF5011; Shigeno-Nakazawa *et al.*, 2016), and hyaline repeats (HYR; Callebaut *et al.*, 2000). The TPR were enriched in *Ca. N. bastadiensis* when compared to other genome sequenced thaumarchaeotes, while the TIR and Ig-like domains were exclusive to *Ca. N. bastadiensis* (Fig. 3,  
65 Supporting Information Fig. S5). Of the TPR containing proteins in *Ca. N. bastadiensis*, 41 represent TPR gene families not previously detected in other thaumarchaeotes. TPR-containing proteins, which mediate protein-protein interactions in eukaryotes (Blatch and Lässle, 1999), are thought to be important for the survival of sponge symbionts in their phagocytic hosts. Two TPR-containing proteins from sponge microbiomes cloned into *E. coli* affected amoeba phagocytosis  
70 (Reynolds and Thomas, 2016), however, both proteins contained the TPR-Sel1 motif which was absent in the TPR-containing proteins from *Ca. N. bastadiensis*. TIR-like proteins have also been found in other marine sponges (Wiens *et al.*, 2006; Gauthier *et al.*, 2010), with these proteins known to be key mediators of the metazoan innate immune response as well as playing a role in regulating metabolic and bioenergetic pathways through modulating NAD<sup>+</sup> levels (Essuman *et al.*,  
75 2018). TIR-like proteins were expressed when sponges were subjected to bacteria-analogue lipoproteins (Wiens *et al.*, 2006) and lipopolysaccharides (Wiens *et al.*, 2005), which in turn caused the expression of a caspase likely involved in apoptosis and a macrophage-expressed protein,

respectively. In this context, it is interesting to note that a protein encoding the DUF1863 domain from a zoonotic *Staphylococcus aureus* can decrease the survivability of mice infected by this strain (Patterson *et al.*, 2014). Furthermore, the DUF1863 domain was recently shown to be a critical component of a bacterial defense system against myophages and may be involved in recognizing specific phage patterns (Doron *et al.*, 2018).

An evolutionary homology between choanoflagellates and sponge choanocytes has long been speculated (Maldonado, 2005; Mah *et al.*, 2014; Laundon *et al.*, 2018). Both have diverse and abundant receptor tyrosine kinases (RTKs) (Srivastava *et al.*, 2010; Miller, 2012), which are crucial components of metazoan signal transduction systems. Interestingly, choanoflagellate proteins with HYR-like domains were recently predicted to act as receptor tyrosine kinases (RTKs) (Manning *et al.*, 2008). As HYR domains are structurally related to Ig and FN3 domains (Callebaut *et al.*, 2000) and choanoflagellates lack the Ig domains found in many metazoan RTKs, the HYR domains may be fulfilling the role of the Ig domains in metazoan RTKs. Furthermore, the Ig-like DUF5011 domain has been found on the extracellular portion of two choanoflagellate homologues of the tyrosine kinase substrate BCAR1 (Shigeno-Nakazawa *et al.*, 2016). Consequently, the numerous DUF5011 and HYR domain containing proteins of *Ca. N. bastadiensis* may be interacting with the host signaling network as *I. basta* likely harbors similar extracellular domains as part of its signal transduction and gene regulatory processes. This host-symbiont interaction is further supported by observations that (i) many *Ca. N. bastadiensis* proteins encoding these domains are predicted to be exported and (ii) five extracellular proteins of the *Ca. N. bastadiensis* exclusive gene family containing the DUF5011 domain were detected in the metaproteome (Supporting Information Table S3).

## Supplementary Experimental Procedures

105 **Phylogenetic analyses.** S-layer proteins were identified in all sequenced thaumarchaeota based on orthologous groups identified with Orthofinder containing members previously identified as SLPs (Li *et al.*, 2018), or also classified as arCOG08647 in EggNOG version 4.5 (Huerta-Cepas *et al.*, 2016). A phylogenetic reconstruction was performed with a thaumarchaeal-specific dataset with a minimal sequence length of 300 amino acids. Sequences were aligned using mafft (Kato and Standley, 2013) and automatically trimmed using trimAl version 1.4 (Capella-Gutiérrez *et al.*, 2009) and the -gappyout function. After model selection using ModelFinder (Kalyaanmoorthy *et al.*, 2017) and a maximum-likelihood amino acid phylogenetic tree was generated using the model LG+F+G4 in IQ-Tree, version 1.6.2 (Nguyen *et al.*, 2015) with 1,000 ultrafast bootstraps (UFBoot).

Genes encoding S08A family endopeptidases were identified in all sequenced  
115 thaumarchaeota if they contained the PF00082 (Peptidase\_S8) domain when searched against the Pfam-A database. The complete sequence set was identified using thaumarchaeal amino acid sequences as individual queries for blastp searches against the Genbank nr database and only top hits containing the PF00082 domain were included. In total 277 representative sequences of the S08A family endopeptidases were used for phylogenetic analyses and sequences were trimmed  
120 according to the presence of the PF00082 domain before alignment using mafft (Kato and Standley, 2013). ModelFinder (Kalyaanmoorthy *et al.*, 2017) was used for model selection and maximum-likelihood phylogenetic analyses implemented with IQ-Tree, version 1.6.2 (Nguyen *et al.*, 2015), using the LG+I+G4 model and 1,000 ultrafast bootstraps (UFBoot). Phylogenetic analyses for serpins (PF00079) were conducted in a similar fashion and 75 representative sequences  
125 were analyzed (after filtering out 46 distant homologues) using the WAG+I+G4 model and 1,000 ultrafast bootstraps.

Phylogenetic analyses were conducted on amino acid sequences of the *LivK* periplasmic branched chain amino acid transporter subunit as well as a concatenated alignment of the *LivFGHMK* operon, using the best model identified for each dataset by ModelFinder (Kalyaanmoorthy *et al.*, 2017) and implemented in IQ-Tree, version 1.6.2 (Nguyen *et al.*, 2015) with 1,000 ultrafast bootstraps (UFBoot). The complete sequence set was identified using individual *Ca. N. bastadiensis* *LivFGHMK* operon subunits as individual queries for blastp searches against the Genbank nr database. Top hits were included along with additional sequences demonstrated to be functional for active substrate transport within the hydrophobic amino-acid uptake transporter (HAAT) family (TCDB:3.A.14; Saier *et al.*, 2009). Sequences were aligned using mafft (Kato and Standley, 2013) and automatically trimmed using trimAl version 1.4 (Capella-Gutiérrez *et al.*, 2009) and the -gappycout function. Models used for maximum-likelihood phylogenetic analyses were LG+F+G4 and LG+F+I+G4 for the *LivK* subunit and the concatenated *livFGHMK* operon, respectively.

140

**Database screening for 16S rRNA gene amplicons.** A reference set of 16S rRNA gene sequences (N=65) from sequenced thaumarchaeotal genomes and amplicons associated with sponges, including *Ca. N. bastadensis* were aligned with SINA (Pruesse *et al.*, 2012) and used to construct a reference tree in RaXML (Stamatakis, 2014). Sequence tags identified by the Sponge Microbiome Project (Moitinho-Silva *et al.*, 2017b) were mapped to the reference set using blastn (Camacho *et al.*, 2009), requiring at least 70% alignment and 90% identity. Successfully mapped reads were then aligned to the reference alignment using SINA and placed into the reference tree using RaXML-EPA (Berger *et al.*, 2011). In addition, 16S rRNA gene sequences related to *Ca. N. bastadensis* were identified in short read archive (SRA) datasets using IMNGS (www.imngs.org - Lagkouvardos *et al.*, 2016) with default parameters.

150



**Figure S1.** Maximum-likelihood amino acid phylogenetic tree (after automatic model selection with IQ-Tree, version 1.6.2) of putative S-layer proteins found in all analyzed thaumarchaeal genomes (28 in total). Sponge-derived sequences are depicted in bold black, while highly expressed proteins from *Ca. N. bastadiensis* are depicted in bold red (6 in total). Highlighted in bold blue are putative S-layer proteins found to be highly expressed in previous proteomics studies (Santoro *et al.*, 2015; Palatinszky *et al.*, 2015; Kerou *et al.*, 2016; Qin *et al.*, 2017; Herbold *et al.*, 2017). Values at nodes represent ultrafast bootstraps (UFBoot) with only values  $\geq 80\%$  shown for each branch.



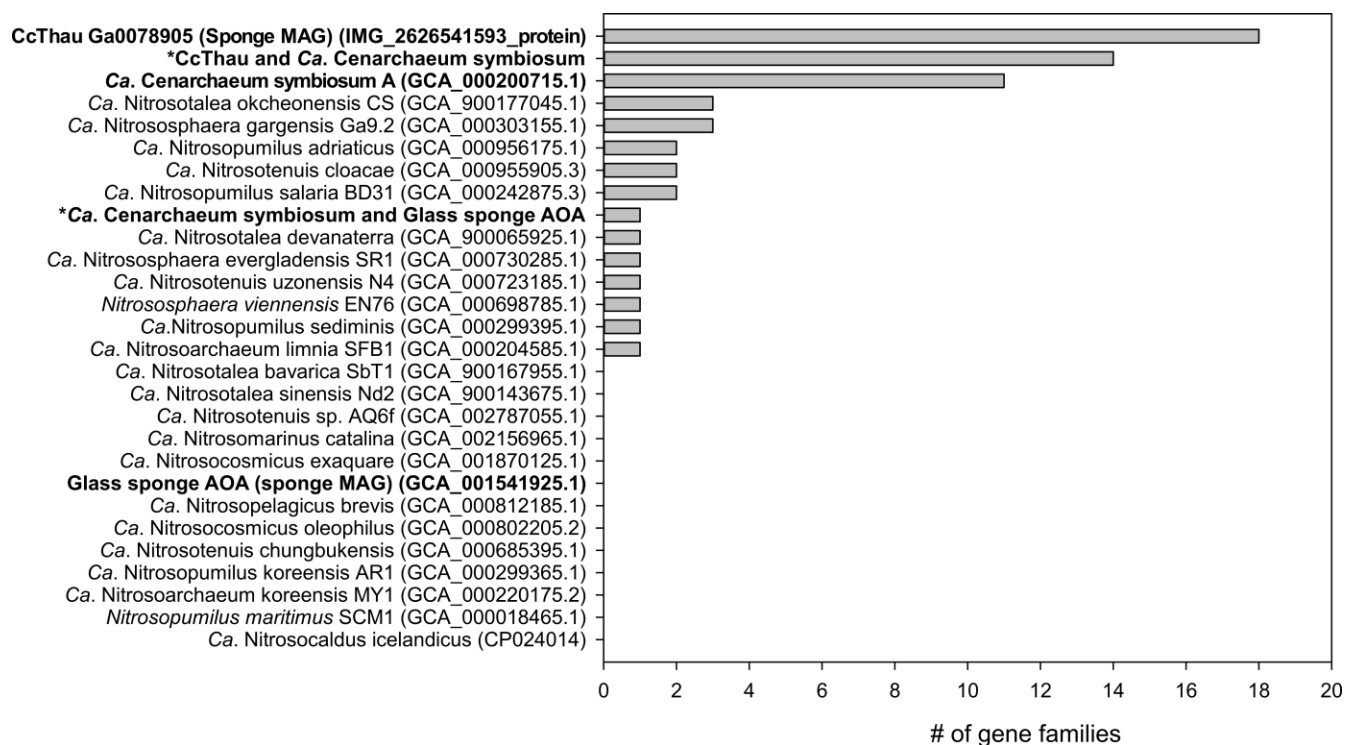

**Figure S2.** Number of gene families shared exclusively between *Ca. N. bastadiensis* and each genome-sequenced member of the *Thaumarchaeota* including the sponge thaumarchaeal symbionts, CcThau, *Ca. C. symbiosum*, and the glass sponge AOA (in bold). (\*) indicates gene families shared by *Ca. N. bastadiensis* with *Ca. C. symbiosum* and CcThau exclusively, or with *Ca. C. symbiosum* and the glass sponge AOA exclusively.

A

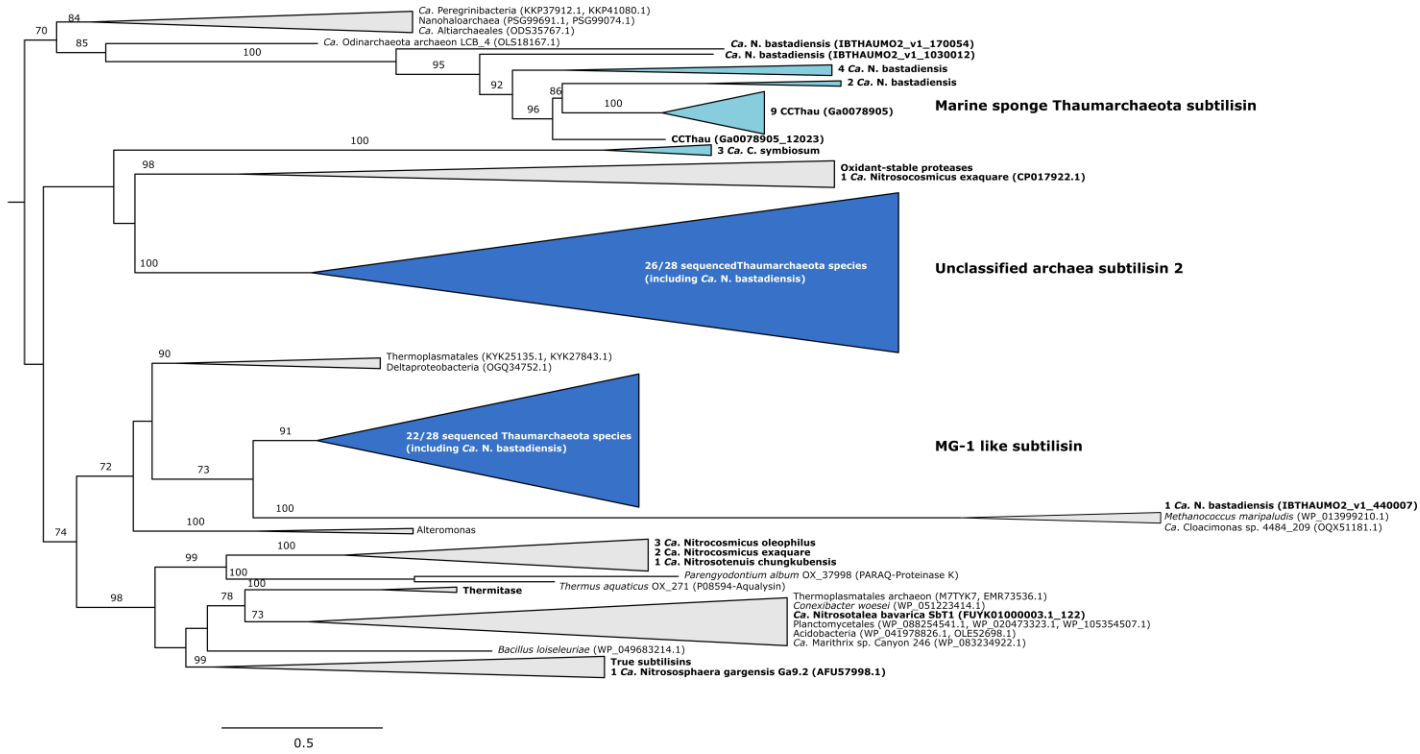

B

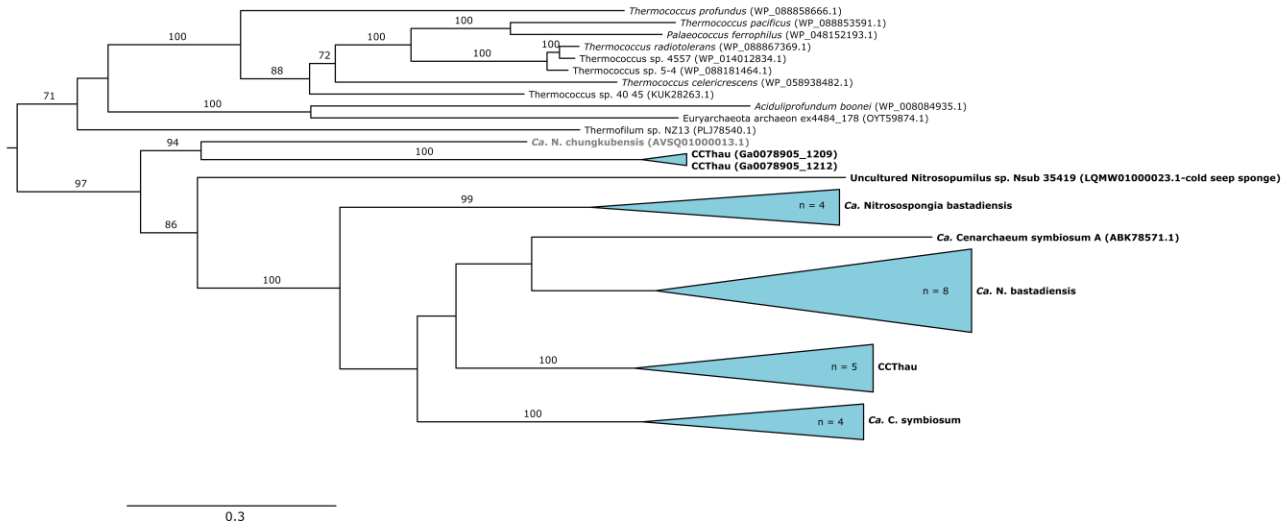

**Figure S3.** Maximum-likelihood amino acid phylogenetic trees (after automatic model selection with IQ-Tree, version 1.6.2) of (A) S08A family endopeptidases and (B) serine protease inhibitors (serpins). Color coding denotes the degree of homology among all sequenced *Thaumarchaeota*: light blue – shared exclusively among thaumarchaeal sponge symbionts; dark blue – ubiquitously found in *Thaumarchaeota*. In (A), 6 out of 8 *Ca. N. bastadiensis* S08A family endopeptidases, within the “Marine sponge Thaumarchaeota subtilisin” clade, are predicted to be exported. On the other hand, the majority of the ubiquitous “Unclassified archaea subtilisin 2” (24/27) and all except one of the “MG-1 like subtilisin” (naming convention after Li *et al.*, 2015) are predicted to be membrane anchored S08A endopeptidases. In (B), 3 of the 15 serpins found in *Ca. N. bastadiensis* were excluded from phylogenetic analyses due to truncated length. Values at nodes represent ultrafast bootstraps (UFBoot) with only values  $\geq 80\%$  shown for each branch.

A

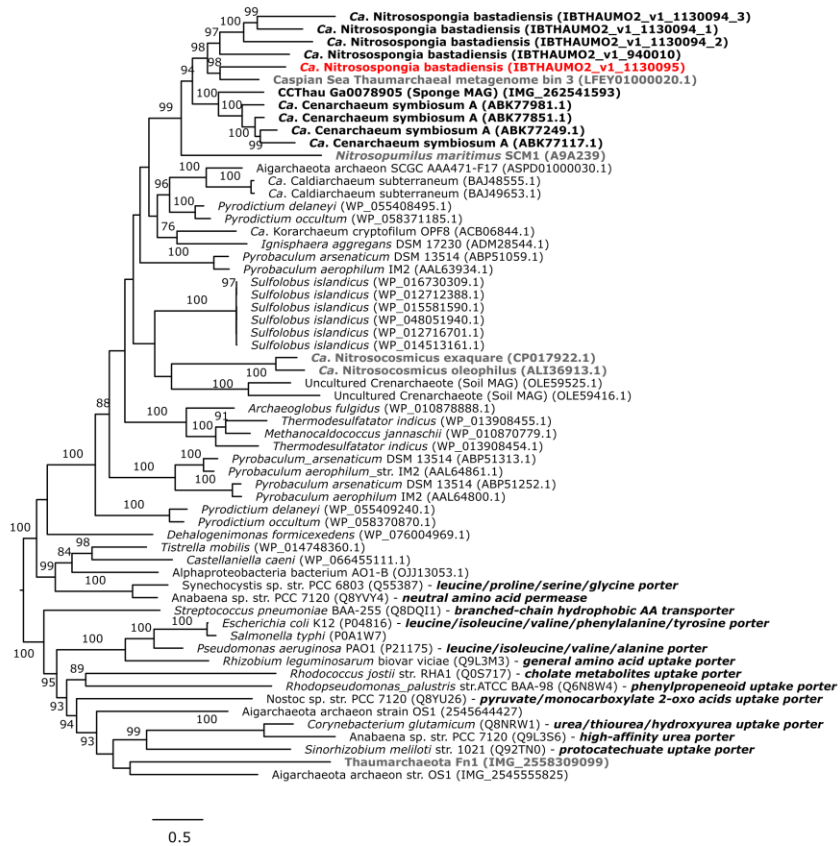

B

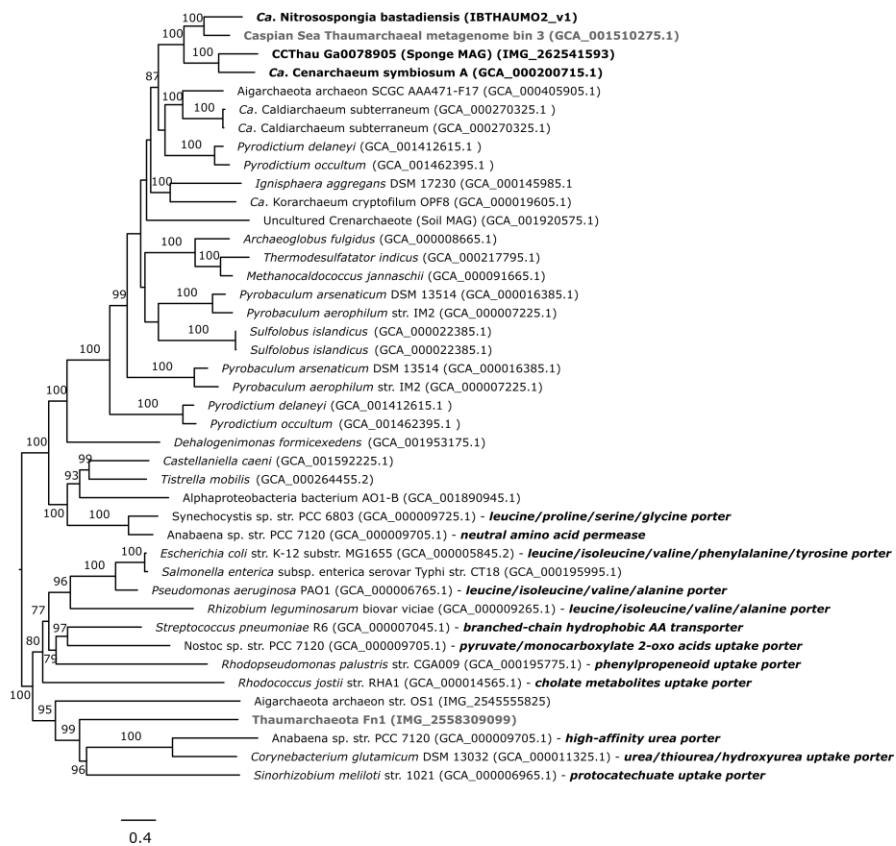

**Figure S4.** Maximum-likelihood amino acid phylogenetic trees (after automatic model selection with IQ-Tree, version 1.6.2) for the periplasmic subunit (A) *LivK* and for the concatenated (B) *LivFGHMK* operon. *LivK* was found to be highly expressed (expressed copy in red) in the *Ca. N. bastadiensis* proteome and can occur in multiple copies among *LivFGHMK* encoding microorganisms. *Ca. N. bastadiensis* has two *LivK* genes and a gene containing three fused *LivK* domains and the predicted proteins from these five *LivK* genes/domains were included in the phylogenetic analysis. *LivK* is also found in some other thaumarchaeotes (bold grey), but these lack the *LivFGHM* genes necessary for branched-chain amino acid transport. In a few cases in the concatenated *LivFGHMK* tree, multiple operons were present in a given genome. For both trees, sponge thaumarchaeal sequences are highlighted in bold black while other thaumarchaeal sequences are highlighted in bold grey. Sequences from organisms where the specific transport functions have been identified, have those specific functions annotated. These annotations are taken from information collated in the Transporter Classification database (Saier *et al.*, 2009). Values at nodes represent ultrafast bootstraps (UFBoot) with only values  $\geq 80\%$  shown for each branch.

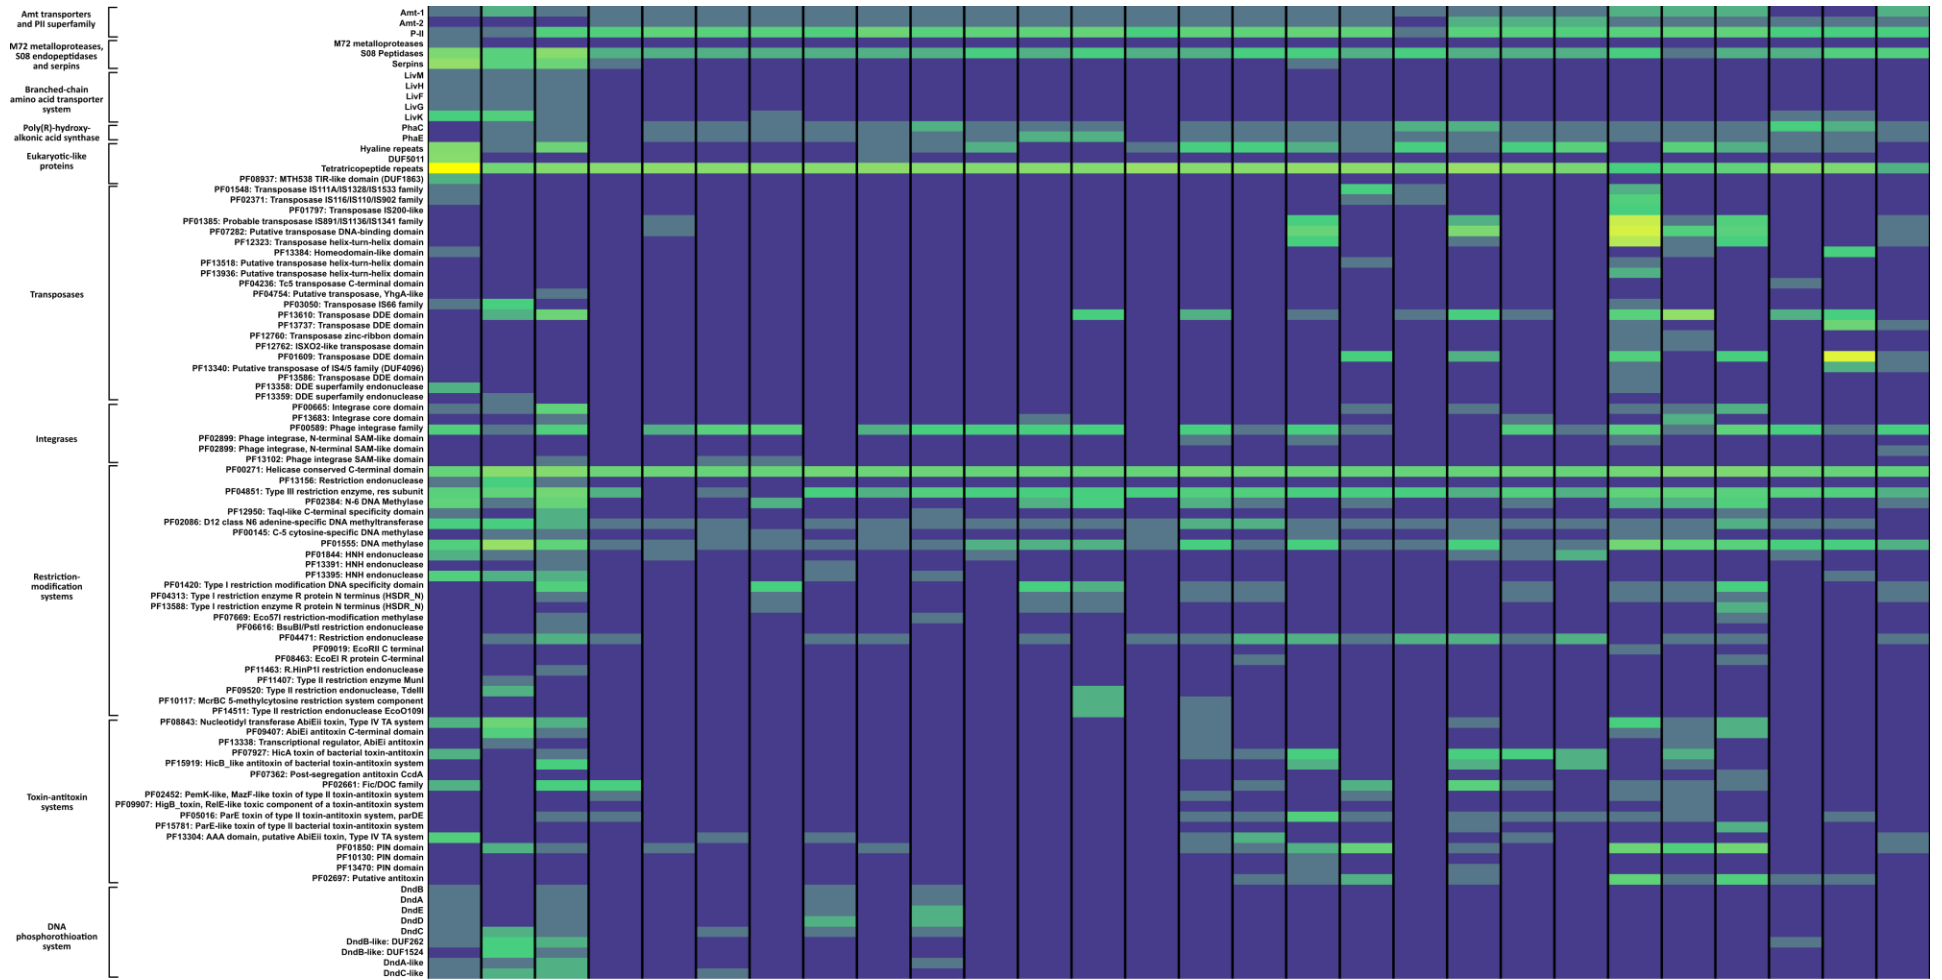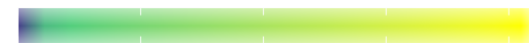

0 10 20 30 40

14 copy/genome

**Figure S5.** Heat map showing the distribution and gene copy number per genome of selected genes, gene classes and PFAM annotations among genome-sequenced AOA. The color scale ranges from 0 (dark blue) to 40 (yellow) and indicates copies per genome. Sponge-derived genomes start on the left and are depicted in bold, followed by members of *Ca. Nitrosopumilaceae*, *Ca. Nitrosotenuaceae*, *Ca. Nitrosotaleale*, the *Nitrososphaerales*, and *Ca. Nitrosocaldales*, respectively. Genome sizes for each member are listed below each name.

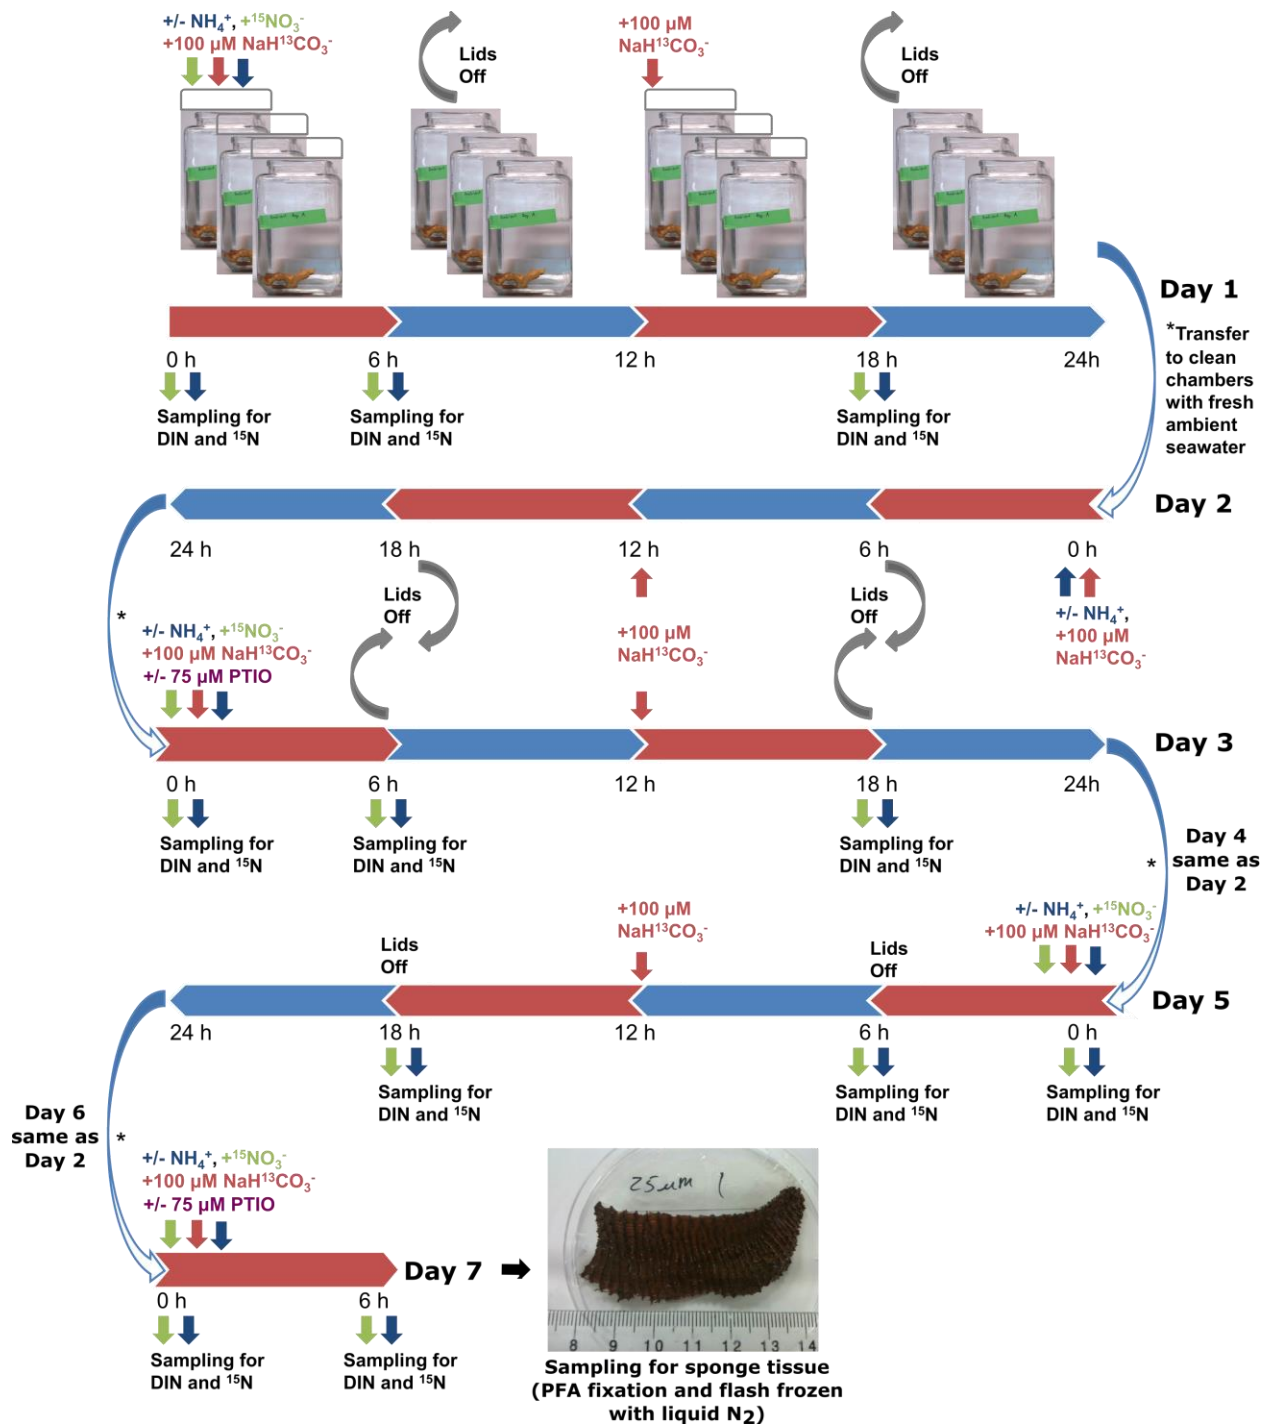

**Figure S6.** Experimental design for the *I. basta* holobiont nitrification incubations. The intermittently closed setup was employed to avoid oxygen depletion while minimizing loss of  $^{13}\text{C}$ -labeled  $\text{HCO}_3^-$ . Green and blue arrows denote samples used for the calculation of net and gross nitrification rates, respectively. Days 4, 5 and 6 were recovery days for those incubations to which PTIO was added.



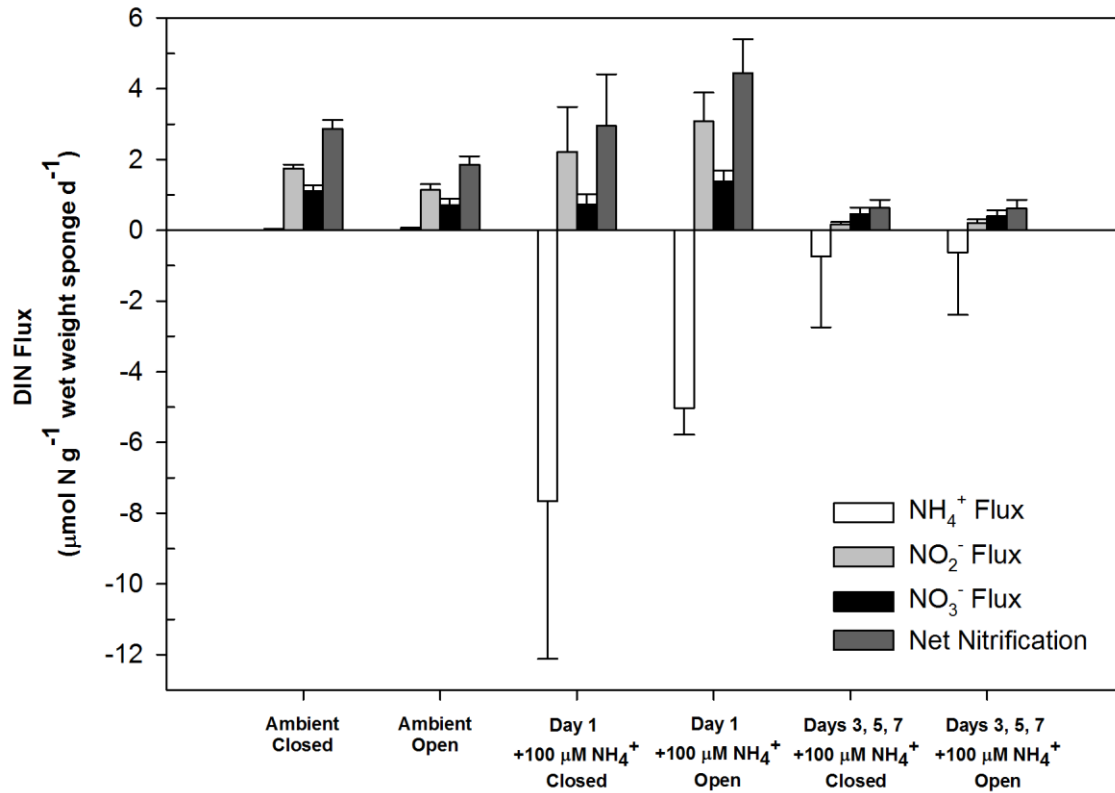

**Figure S7.** Comparison of average DIN ( $\text{NH}_4^+$ ,  $\text{NO}_3^-$ ,  $\text{NO}_2^-$ ) flux and net nitrification rates exhibited by the *I. basta* holobiont in multiple-day incubations between intermittently closed (Supplementary Figure 1) and completely open aquaria at ambient conditions and at  $100 \mu\text{M NH}_4^+$ . Pair-wise comparisons of individual DIN species flux and net nitrification between open and intermittently closed aquaria, revealed significant differences in net  $\text{NO}_2^-$  flux and net nitrification between ambient treatments (both:  $p < 0.01$ , Mann-Whitney U-test).

**Table S1.** Overview of genome binning parameters, statistics and associated metadata for the *Ca. N. bastadiensis* genome bin.

| <b>Bin ID</b>                       | <b>IBThaumO2</b>                        |
|-------------------------------------|-----------------------------------------|
| Analysis project type               | metagenome-assembled genome (MAG)       |
| Taxa_id                             | 16S rRNA and multi-marker phylogenetics |
| Assembly software                   | Spades                                  |
| Annotation                          | MaGe                                    |
| Genome Quality                      | High Quality Draft                      |
| Completeness (%)                    | 99.03                                   |
| Contamination (%)                   | 0.97                                    |
| Completeness/Contamination Software | CheckM                                  |
| Number of contigs                   | 113                                     |
| 16S rRNA gene recovered             | yes                                     |
| 16S rRNA gene recovery software     | Rnammer / MaGe                          |
| Number of standard tRNAs extracted  | 20                                      |
| tRNA extraction software            | tRNA-scan / MaGe                        |
| Binning software                    | metabat2                                |
| Binning parameters                  | kmer                                    |
| Genome size (Mbp)                   | 1.99                                    |
| N50 (bp)                            | 35099                                   |
| Longest contig (bp)                 | 135,585                                 |
| Average contig length (bp)          | 17,669.70                               |
| GC content (%)                      | 64.8                                    |
| Protein coding sequences            | 2,342                                   |
| rRNAs                               | 3                                       |
| tRNAs                               | 42                                      |

**Table S2.** Presence of genes of interest (see Figure 3) in the two *Ca. N. bastadiensis* MAGs (obtained from two *I. basta* individuals by Illumina and 454 pyrosequencing, respectively) as determined by BLASTp.

|                      | qseqid               | sseqid             | pident | length | qlen | slen | evalue    | bitscore | query match coverage | subject match coverage |
|----------------------|----------------------|--------------------|--------|--------|------|------|-----------|----------|----------------------|------------------------|
| M72 metalloproteases | IBTHAUM02_v1_880008  | IBTHAUMv1_16080007 | 64.242 | 660    | 2028 | 2440 | 0         | 729      | 32.54                | 26.76                  |
| S08 Peptidases       | IBTHAUM02_v1_1030012 | IBTHAUMv1_12290002 | 91.578 | 5141   | 5956 | 6201 | 0         | 9250     | 86.32                | 82.26                  |
|                      | IBTHAUM02_v1_150018  | IBTHAUMv1_17130004 | 99.286 | 560    | 908  | 611  | 0         | 1133     | 61.67                | 91.49                  |
|                      | IBTHAUM02_v1_160002  | IBTHAUMv1_1950001  | 100    | 659    | 1181 | 1349 | 0         | 1355     | 55.80                | 48.78                  |
|                      | IBTHAUM02_v1_170054  | IBTHAUMv1_3990003  | 99.646 | 1695   | 1695 | 1695 | 0         | 3440     | 100.00               | 99.94                  |
|                      | IBTHAUM02_v1_220007  | IBTHAUMv1_13830026 | 99.542 | 655    | 655  | 655  | 0         | 1257     | 100.00               | 99.85                  |
|                      | IBTHAUM02_v1_250004  | IBTHAUMv1_4210010  | 65.672 | 268    | 303  | 1619 | 1.16E-98  | 315      | 88.45                | 16.24                  |
|                      | IBTHAUM02_v1_440007  | IBTHAUMv1_14780018 | 99.856 | 696    | 699  | 696  | 0         | 1429     | 99.57                | 99.86                  |
|                      | IBTHAUM02_v1_470031  | IBTHAUMv1_15480003 | 99.794 | 1459   | 1459 | 1459 | 0         | 2938     | 100.00               | 99.93                  |
|                      | IBTHAUM02_v1_470037  | IBTHAUMv1_15480010 | 99.446 | 1264   | 1264 | 1266 | 0         | 2486     | 100.00               | 99.76                  |
|                      | IBTHAUM02_v1_600001  | IBTHAUMv1_1950001  | 89.893 | 1029   | 1563 | 1349 | 0         | 1843     | 65.83                | 76.20                  |
|                      | IBTHAUM02_v1_810001  | IBTHAUMv1_16080007 | 92.872 | 2413   | 2385 | 2440 | 0         | 4403     | 101.17               | 98.11                  |
| Serpins              | IBTHAUM02_v1_1040003 | IBTHAUMv1_16780011 | 78.208 | 413    | 472  | 412  | 0         | 620      | 87.50                | 99.76                  |
|                      | IBTHAUM02_v1_150002  | IBTHAUMv1_9590002  | 100    | 412    | 412  | 412  | 0         | 835      | 100.00               | 99.76                  |
|                      | IBTHAUM02_v1_150006  | IBTHAUMv1_2680003  | 99.589 | 487    | 487  | 487  | 0         | 979      | 100.00               | 99.79                  |
|                      | IBTHAUM02_v1_150019  | IBTHAUMv1_17130003 | 100    | 468    | 501  | 499  | 0         | 943      | 93.41                | 93.59                  |
|                      | IBTHAUM02_v1_160001  | IBTHAUMv1_15480013 | 98.14  | 645    | 646  | 649  | 0         | 1268     | 99.85                | 99.23                  |
|                      | IBTHAUM02_v1_250003  | IBTHAUMv1_9590002  | 83.846 | 390    | 413  | 412  | 0         | 665      | 94.43                | 92.48                  |
|                      | IBTHAUM02_v1_250005  | IBTHAUMv1_3270002  | 50.427 | 117    | 107  | 377  | 4.53E-25  | 94.4     | 109.35               | 30.77                  |
|                      | IBTHAUM02_v1_470041  | IBTHAUMv1_17030009 | 92.308 | 273    | 389  | 649  | 0         | 521      | 70.18                | 41.91                  |
|                      | IBTHAUM02_v1_470042  | IBTHAUMv1_16080008 | 74.297 | 498    | 498  | 498  | 0         | 667      | 100.00               | 99.20                  |
|                      | IBTHAUM02_v1_530010  | IBTHAUMv1_3270002  | 97.706 | 218    | 240  | 377  | 3.43E-150 | 421      | 90.83                | 57.56                  |
|                      | IBTHAUM02_v1_530011  | IBTHAUMv1_3270002  | 98.052 | 154    | 154  | 377  | 7.63E-104 | 299      | 100.00               | 40.58                  |
|                      | IBTHAUM02_v1_630004  | IBTHAUMv1_4530014  | 100    | 419    | 419  | 419  | 0         | 853      | 100.00               | 99.76                  |
|                      | IBTHAUM02_v1_740001  | IBTHAUMv1_2680003  | 95.833 | 72     | 74   | 487  | 2.60E-36  | 124      | 97.30                | 14.58                  |
|                      | IBTHAUM02_v1_810003  | IBTHAUMv1_16080004 | 100    | 474    | 474  | 474  | 0         | 970      | 100.00               | 99.79                  |
|                      | IBTHAUM02_v1_880009  | IBTHAUMv1_16080008 | 100    | 498    | 498  | 498  | 0         | 1014     | 100.00               | 99.80                  |
| LivM                 | IBTHAUM02_v1_1130089 | IBTHAUMv1_13040008 | 99.717 | 353    | 353  | 353  | 0         | 677      | 100.00               | 99.72                  |
| LivH                 | IBTHAUM02_v1_1130090 | IBTHAUMv1_13040007 | 100    | 306    | 306  | 306  | 0         | 587      | 100.00               | 99.67                  |
| LivF                 | IBTHAUM02_v1_1130093 | IBTHAUMv1_13040004 | 100    | 238    | 238  | 238  | 1.80E-172 | 471      | 100.00               | 99.58                  |
| LivG                 | IBTHAUM02_v1_1130092 | IBTHAUMv1_13040005 | 99.209 | 253    | 269  | 253  | 0         | 496      | 94.05                | 99.60                  |

|                          |                      |                    |        |      |      |      |           |      |        |       |
|--------------------------|----------------------|--------------------|--------|------|------|------|-----------|------|--------|-------|
| LivK                     | IBTHAUMO2_v1_1130094 | IBTHAUMv1_13040003 | 99.688 | 642  | 1149 | 642  | 0         | 1236 | 55.87  | 99.84 |
| LivK                     | IBTHAUMO2_v1_1130095 | IBTHAUMv1_16960002 | 93.738 | 527  | 527  | 511  | 0         | 993  | 100.00 | 99.80 |
| LivK                     | IBTHAUMO2_v1_940010  | IBTHAUMv1_330001   | 100    | 314  | 402  | 314  | 0         | 622  | 78.11  | 99.68 |
| DndB                     | IBTHAUMO2_v1_810011  | IBTHAUMv1_190016   | 44.688 | 320  | 362  | 319  | 2.21E-98  | 292  | 88.40  | 98.43 |
| DndA                     | IBTHAUMO2_v1_880013  | IBTHAUMv1_140010   | 70.712 | 379  | 391  | 388  | 0         | 566  | 96.93  | 97.42 |
| DndE                     | IBTHAUMO2_v1_880014  | IBTHAUMv1_140009   | 39.655 | 116  | 123  | 126  | 1.18E-32  | 108  | 94.31  | 91.27 |
| DndD                     | IBTHAUMO2_v1_880015  | IBTHAUMv1_190014   | 34.074 | 675  | 675  | 660  | 1.80E-107 | 337  | 100.00 | 99.55 |
| DndC                     | IBTHAUMO2_v1_880016  | IBTHAUMv1_140006   | 56.592 | 493  | 473  | 502  | 0         | 576  | 104.23 | 98.01 |
| DndB-like: DUF262        | IBTHAUMO2_v1_1050033 | IBTHAUMv1_380002   | 27.711 | 166  | 425  | 344  | 2.67E-10  | 58.9 | 39.06  | 44.48 |
| DndA-like                | IBTHAUMO2_v1_690025  | IBTHAUMv1_3820004  | 99.482 | 386  | 386  | 386  | 0         | 772  | 100.00 | 99.74 |
| DndC-like                | IBTHAUMO2_v1_690027  | IBTHAUMv1_17710003 | 100    | 280  | 280  | 280  | 0         | 582  | 100.00 | 99.64 |
| PF08937: MTH538 TIR-like | IBTHAUMO2_v1_460006  | IBTHAUMv1_14780023 | 100    | 130  | 130  | 170  | 7.13E-94  | 265  | 100.00 | 75.88 |
|                          | IBTHAUMO2_v1_620008  | IBTHAUMv1_14750015 | 100    | 172  | 172  | 172  | 3.99E-126 | 349  | 100.00 | 99.42 |
| Hyaline repeats          | IBTHAUMO2_v1_150018  | IBTHAUMv1_17130004 | 99.286 | 560  | 908  | 611  | 0         | 1133 | 61.67  | 91.49 |
|                          | IBTHAUMO2_v1_1050019 | IBTHAUMv1_14910004 | 99.774 | 442  | 442  | 442  | 0         | 880  | 100.00 | 99.77 |
|                          | IBTHAUMO2_v1_1050020 | IBTHAUMv1_14910005 | 75.036 | 701  | 705  | 702  | 0         | 988  | 99.43  | 99.15 |
|                          | IBTHAUMO2_v1_1110002 | IBTHAUMv1_460002   | 44.798 | 471  | 491  | 487  | 8.48E-124 | 368  | 95.93  | 96.51 |
|                          | IBTHAUMO2_v1_1110003 | IBTHAUMv1_15140009 | 49.099 | 444  | 443  | 452  | 2.55E-124 | 366  | 100.23 | 97.35 |
|                          | IBTHAUMO2_v1_220002  | IBTHAUMv1_150003   | 86.853 | 715  | 712  | 715  | 0         | 1217 | 100.42 | 99.86 |
|                          | IBTHAUMO2_v1_450016  | IBTHAUMv1_3920005  | 97.511 | 442  | 630  | 442  | 0         | 862  | 70.16  | 99.77 |
|                          | IBTHAUMO2_v1_470043  | IBTHAUMv1_16080007 | 92.531 | 241  | 237  | 2440 | 1.02E-125 | 389  | 101.69 | 9.80  |
|                          | IBTHAUMO2_v1_720042  | IBTHAUMv1_14780010 | 48.347 | 242  | 268  | 742  | 1.76E-63  | 209  | 90.30  | 31.81 |
|                          | IBTHAUMO2_v1_810001  | IBTHAUMv1_16080007 | 92.872 | 2413 | 2385 | 2440 | 0         | 4403 | 101.17 | 98.11 |
|                          | IBTHAUMO2_v1_880008  | IBTHAUMv1_16080007 | 64.242 | 660  | 2028 | 2440 | 0         | 729  | 32.54  | 26.76 |
| PF16403: DUF5011         | IBTHAUMO2_v1_1030012 | IBTHAUMv1_12290002 | 91.578 | 5141 | 5956 | 6201 | 0         | 9250 | 86.32  | 82.26 |
|                          | IBTHAUMO2_v1_170054  | IBTHAUMv1_3990003  | 99.646 | 1695 | 1695 | 1695 | 0         | 3440 | 100.00 | 99.94 |
|                          | IBTHAUMO2_v1_20012   | IBTHAUMv1_11360007 | 95.513 | 936  | 1651 | 962  | 0         | 1722 | 56.69  | 97.19 |
|                          | IBTHAUMO2_v1_240080  | IBTHAUMv1_11360001 | 98.649 | 2073 | 2073 | 2073 | 0         | 4182 | 100.00 | 99.95 |
|                          | IBTHAUMO2_v1_290009  | IBTHAUMv1_13830036 | 99.644 | 1966 | 1966 | 1966 | 0         | 3962 | 100.00 | 99.95 |
|                          | IBTHAUMO2_v1_320050  | IBTHAUMv1_2050001  | 97.937 | 1115 | 1328 | 1117 | 0         | 2196 | 83.96  | 99.73 |
|                          | IBTHAUMO2_v1_460001  | IBTHAUMv1_14780028 | 91.978 | 1633 | 1773 | 4551 | 0         | 2982 | 92.10  | 35.62 |
|                          | IBTHAUMO2_v1_470031  | IBTHAUMv1_15480003 | 99.794 | 1459 | 1459 | 1459 | 0         | 2938 | 100.00 | 99.93 |
|                          | IBTHAUMO2_v1_590001  | IBTHAUMv1_20280001 | 98.699 | 615  | 648  | 1427 | 0         | 1256 | 94.91  | 43.03 |
|                          | IBTHAUMO2_v1_590078  | IBTHAUMv1_13120027 | 99.522 | 837  | 1040 | 848  | 0         | 1659 | 80.48  | 98.58 |

|                           |                      |                    |        |      |      |       |           |      |        |       |
|---------------------------|----------------------|--------------------|--------|------|------|-------|-----------|------|--------|-------|
|                           | IBTHAUMO2_v1_620022  | IBTHAUMv1_12370012 | 98.862 | 1845 | 1845 | 2170  | 0         | 3714 | 100.00 | 84.98 |
|                           | IBTHAUMO2_v1_700001  | IBTHAUMv1_18570002 | 76.798 | 2836 | 3095 | 8426  | 0         | 4177 | 91.63  | 33.54 |
|                           | IBTHAUMO2_v1_990001  | IBTHAUMv1_4410003  | 99.731 | 1116 | 1116 | 11182 | 0         | 2271 | 100.00 | 9.97  |
| Tetratricopeptide repeats | IBTHAUMO2_v1_20005   | IBTHAUMv1_4210007  | 100    | 542  | 542  | 561   | 0         | 1096 | 100.00 | 96.43 |
|                           | IBTHAUMO2_v1_260017  | IBTHAUMv1_1700002  | 99.743 | 389  | 389  | 394   | 0         | 786  | 100.00 | 98.48 |
|                           | IBTHAUMO2_v1_450009  | IBTHAUMv1_15960007 | 98.947 | 665  | 665  | 665   | 0         | 1304 | 100.00 | 99.85 |
|                           | IBTHAUMO2_v1_590071  | IBTHAUMv1_13120019 | 98.704 | 463  | 463  | 463   | 0         | 926  | 100.00 | 99.78 |
|                           | IBTHAUMO2_v1_690013  | IBTHAUMv1_11050005 | 100    | 236  | 236  | 236   | 4.75E-174 | 475  | 100.00 | 99.58 |
|                           | IBTHAUMO2_v1_250010  | IBTHAUMv1_1040006  | 97.196 | 214  | 214  | 214   | 2.07E-147 | 406  | 100.00 | 99.53 |
|                           | IBTHAUMO2_v1_590041  | IBTHAUMv1_4080009  | 98.78  | 738  | 738  | 738   | 0         | 1435 | 100.00 | 99.86 |
|                           | IBTHAUMO2_v1_730001  | IBTHAUMv1_5300001  | 97.778 | 90   | 123  | 144   | 3.63E-61  | 181  | 73.17  | 61.81 |
|                           | IBTHAUMO2_v1_1130054 | IBTHAUMv1_13940010 | 100    | 262  | 262  | 262   | 0         | 514  | 100.00 | 99.62 |
|                           | IBTHAUMO2_v1_10010   | IBTHAUMv1_1840004  | 33.738 | 412  | 416  | 754   | 3.80E-61  | 208  | 99.04  | 54.24 |
|                           | IBTHAUMO2_v1_1080005 | IBTHAUMv1_16190004 | 99.153 | 118  | 118  | 118   | 1.76E-83  | 237  | 100.00 | 99.15 |
|                           | IBTHAUMO2_v1_1120015 | IBTHAUMv1_5290001  | 59.541 | 566  | 738  | 565   | 0         | 629  | 76.69  | 99.47 |
|                           | IBTHAUMO2_v1_170044  | IBTHAUMv1_3990013  | 99.425 | 174  | 174  | 174   | 1.18E-117 | 328  | 100.00 | 99.43 |
|                           | IBTHAUMO2_v1_200001  | IBTHAUMv1_15480023 | 99.693 | 326  | 417  | 326   | 0         | 643  | 78.18  | 99.69 |
|                           | IBTHAUMO2_v1_20006   | IBTHAUMv1_4210006  | 100    | 495  | 495  | 495   | 0         | 997  | 100.00 | 99.80 |
|                           | IBTHAUMO2_v1_260040  | IBTHAUMv1_1140003  | 99.635 | 274  | 274  | 274   | 0         | 539  | 100.00 | 99.64 |
|                           | IBTHAUMO2_v1_330008  | IBTHAUMv1_17060002 | 94.872 | 429  | 457  | 443   | 0         | 805  | 93.87  | 96.61 |
|                           | IBTHAUMO2_v1_410008  | IBTHAUMv1_13120019 | 45.02  | 251  | 274  | 463   | 1.19E-66  | 212  | 91.61  | 52.92 |
|                           | IBTHAUMO2_v1_410009  | IBTHAUMv1_1610001  | 94.574 | 387  | 399  | 394   | 0         | 697  | 96.99  | 97.97 |
|                           | IBTHAUMO2_v1_440013  | IBTHAUMv1_14780004 | 86.288 | 598  | 598  | 598   | 0         | 1035 | 100.00 | 99.83 |
|                           | IBTHAUMO2_v1_450076  | IBTHAUMv1_15360002 | 100    | 299  | 299  | 299   | 0         | 563  | 100.00 | 99.67 |
|                           | IBTHAUMO2_v1_480001  | IBTHAUMv1_3180004  | 100    | 339  | 339  | 339   | 0         | 669  | 100.00 | 99.71 |
|                           | IBTHAUMO2_v1_480002  | IBTHAUMv1_3180005  | 99.76  | 416  | 434  | 416   | 0         | 793  | 95.85  | 99.76 |
|                           | IBTHAUMO2_v1_510001  | IBTHAUMv1_2270002  | 100    | 279  | 279  | 534   | 0         | 553  | 100.00 | 52.06 |
|                           | IBTHAUMO2_v1_690014  | IBTHAUMv1_11050004 | 98.305 | 236  | 236  | 236   | 9.73E-172 | 469  | 100.00 | 99.58 |
|                           | IBTHAUMO2_v1_650002  | IBTHAUMv1_20210002 | 100    | 262  | 262  | 262   | 0         | 516  | 100.00 | 99.62 |
|                           | IBTHAUMO2_v1_700005  | IBTHAUMv1_21200002 | 96.032 | 252  | 256  | 256   | 4.84E-171 | 469  | 98.44  | 98.05 |
|                           | IBTHAUMO2_v1_750012  | IBTHAUMv1_2270002  | 100    | 241  | 243  | 534   | 4.86E-176 | 492  | 99.18  | 44.94 |
|                           | IBTHAUMO2_v1_790015  | IBTHAUMv1_15480026 | 99.77  | 435  | 435  | 435   | 0         | 852  | 100.00 | 99.77 |
|                           | IBTHAUMO2_v1_880020  | IBTHAUMv1_2270002  | 99.17  | 241  | 268  | 534   | 1.46E-174 | 489  | 89.93  | 44.94 |
|                           | IBTHAUMO2_v1_940002  | IBTHAUMv1_4830003  | 96.811 | 439  | 439  | 439   | 0         | 838  | 100.00 | 99.77 |

|                                  |                      |                    |        |      |      |      |           |      |        |       |
|----------------------------------|----------------------|--------------------|--------|------|------|------|-----------|------|--------|-------|
|                                  | IBTHAUMO2_v1_990018  | IBTHAUMv1_16760014 | 100    | 140  | 140  | 140  | 2.46E-92  | 261  | 100.00 | 99.29 |
|                                  | IBTHAUMO2_v1_200002  | IBTHAUMv1_15480022 | 93.885 | 278  | 283  | 286  | 4.26E-178 | 489  | 98.23  | 96.85 |
|                                  | IBTHAUMO2_v1_20010   | IBTHAUMv1_4210003  | 98.396 | 187  | 187  | 187  | 1.12E-126 | 352  | 100.00 | 99.47 |
|                                  | IBTHAUMO2_v1_720008  | IBTHAUMv1_4130013  | 100    | 127  | 127  | 127  | 1.21E-88  | 250  | 100.00 | 99.21 |
|                                  | IBTHAUMO2_v1_380029  | IBTHAUMv1_11240003 | 100    | 309  | 309  | 309  | 0         | 606  | 100.00 | 99.68 |
|                                  | IBTHAUMO2_v1_590042  | IBTHAUMv1_4080008  | 99.286 | 420  | 423  | 423  | 0         | 845  | 99.29  | 99.05 |
|                                  | IBTHAUMO2_v1_990017  | IBTHAUMv1_16760013 | 100    | 68   | 68   | 68   | 7.21E-43  | 130  | 100.00 | 98.53 |
|                                  | IBTHAUMO2_v1_480009  | IBTHAUMv1_90003    | 100    | 197  | 197  | 237  | 5.88E-143 | 395  | 100.00 | 82.70 |
|                                  | IBTHAUMO2_v1_700003  | IBTHAUMv1_20360001 | 100    | 204  | 204  | 252  | 2.91E-149 | 412  | 100.00 | 80.56 |
| Transposases                     | IBTHAUMO2_v1_1050022 | IBTHAUMv1_8580062  | 99.457 | 368  | 368  | 368  | 0         | 733  | 100.00 | 99.73 |
|                                  | IBTHAUMO2_v1_560020  | IBTHAUMv1_23780003 | 100    | 120  | 121  | 144  | 2.04E-87  | 248  | 99.17  | 82.64 |
|                                  | IBTHAUMO2_v1_1100079 | IBTHAUMv1_4230002  | 100    | 172  | 172  | 354  | 6.57E-127 | 358  | 100.00 | 48.31 |
|                                  | IBTHAUMO2_v1_1110001 | IBTHAUMv1_14670003 | 100    | 147  | 147  | 339  | 1.13E-106 | 305  | 100.00 | 43.07 |
|                                  | IBTHAUMO2_v1_20011   | IBTHAUMv1_18170003 | 100    | 119  | 119  | 454  | 1.75E-82  | 246  | 100.00 | 25.99 |
| Integrases                       | IBTHAUMO2_v1_240171  | IBTHAUMv1_2410001  | 99.74  | 385  | 557  | 387  | 0         | 801  | 69.12  | 99.22 |
|                                  | IBTHAUMO2_v1_450024  | IBTHAUMv1_16200001 | 100    | 454  | 454  | 472  | 0         | 939  | 100.00 | 95.97 |
|                                  | IBTHAUMO2_v1_730023  | IBTHAUMv1_1500005  | 98.063 | 413  | 448  | 424  | 0         | 840  | 92.19  | 96.93 |
|                                  | IBTHAUMO2_v1_880010  | IBTHAUMv1_16080009 | 99.787 | 469  | 469  | 469  | 0         | 967  | 100.00 | 99.79 |
|                                  | IBTHAUMO2_v1_780006  | IBTHAUMv1_11050003 | 99.674 | 307  | 307  | 343  | 0         | 628  | 100.00 | 89.21 |
| Restriction-modification systems | IBTHAUMO2_v1_1050026 | IBTHAUMv1_1120001  | 25.738 | 237  | 927  | 640  | 2.47E-06  | 48.5 | 25.57  | 31.41 |
|                                  | IBTHAUMO2_v1_1130086 | IBTHAUMv1_13350012 | 25.895 | 475  | 612  | 1038 | 8.26E-32  | 129  | 77.61  | 45.47 |
|                                  | IBTHAUMO2_v1_260066  | IBTHAUMv1_14890001 | 99.05  | 421  | 1333 | 586  | 0         | 863  | 31.58  | 71.67 |
|                                  | IBTHAUMO2_v1_700006  | IBTHAUMv1_4230001  | 100    | 887  | 953  | 889  | 0         | 1845 | 93.07  | 99.66 |
|                                  | IBTHAUMO2_v1_880011  | IBTHAUMv1_13350012 | 20.659 | 334  | 908  | 1038 | 2.49E-06  | 48.9 | 36.78  | 31.21 |
|                                  | IBTHAUMO2_v1_890002  | IBTHAUMv1_13350012 | 99.711 | 1038 | 1037 | 1038 | 0         | 2118 | 100.10 | 99.90 |
|                                  | IBTHAUMO2_v1_240074  | IBTHAUMv1_15140004 | 99.184 | 490  | 490  | 490  | 0         | 975  | 100.00 | 99.80 |
|                                  | IBTHAUMO2_v1_240151  | IBTHAUMv1_16180005 | 100    | 574  | 574  | 582  | 0         | 1178 | 100.00 | 98.45 |
|                                  | IBTHAUMO2_v1_280001  | IBTHAUMv1_11110026 | 98.119 | 638  | 675  | 729  | 0         | 1280 | 94.52  | 87.38 |
|                                  | IBTHAUMO2_v1_380002  | IBTHAUMv1_11240027 | 99.42  | 862  | 862  | 862  | 0         | 1708 | 100.00 | 99.88 |
|                                  | IBTHAUMO2_v1_730017  | IBTHAUMv1_3930004  | 99.719 | 711  | 711  | 711  | 0         | 1407 | 100.00 | 99.86 |
|                                  | IBTHAUMO2_v1_800038  | IBTHAUMv1_3940004  | 100    | 648  | 648  | 648  | 0         | 1320 | 100.00 | 99.85 |
|                                  | IBTHAUMO2_v1_260067  | IBTHAUMv1_980001   | 97.107 | 242  | 271  | 273  | 1.02E-174 | 480  | 89.30  | 88.28 |
|                                  | IBTHAUMO2_v1_590086  | IBTHAUMv1_1620001  | 35     | 60   | 854  | 856  | 3.10E-01  | 32   | 7.03   | 6.89  |
|                                  | IBTHAUMO2_v1_790008  | IBTHAUMv1_19180002 | 90.868 | 438  | 439  | 442  | 0         | 823  | 99.77  | 98.87 |

|                          |                      |                    |        |     |     |     |           |     |        |       |
|--------------------------|----------------------|--------------------|--------|-----|-----|-----|-----------|-----|--------|-------|
|                          | IBTHAUMO2_v1_390013  | IBTHAUMv1_14530025 | 99.27  | 274 | 290 | 283 | 0         | 559 | 94.48  | 96.47 |
|                          | IBTHAUMO2_v1_590085  | IBTHAUMv1_9460007  | 29.957 | 464 | 633 | 608 | 3.18E-52  | 187 | 73.30  | 63.65 |
|                          | IBTHAUMO2_v1_590087  | IBTHAUMv1_9460007  | 35.641 | 390 | 594 | 608 | 7.75E-62  | 213 | 65.66  | 59.38 |
|                          | IBTHAUMO2_v1_740003  | IBTHAUMv1_70001    | 66     | 450 | 446 | 477 | 0         | 639 | 100.90 | 94.13 |
|                          | IBTHAUMO2_v1_320013  | IBTHAUMv1_3540002  | 100    | 281 | 281 | 281 | 0         | 561 | 100.00 | 99.64 |
|                          | IBTHAUMO2_v1_390007  | IBTHAUMv1_14530029 | 98.233 | 283 | 299 | 287 | 0         | 558 | 94.65  | 98.26 |
|                          | IBTHAUMO2_v1_770023  | IBTHAUMv1_19010011 | 100    | 269 | 269 | 269 | 0         | 558 | 100.00 | 99.63 |
|                          | IBTHAUMO2_v1_240101  | IBTHAUMv1_10080009 | 99.569 | 464 | 510 | 467 | 0         | 925 | 90.98  | 99.14 |
|                          | IBTHAUMO2_v1_590091  | IBTHAUMv1_7470001  | 93.216 | 398 | 462 | 399 | 0         | 763 | 86.15  | 99.50 |
|                          | IBTHAUMO2_v1_690028  | IBTHAUMv1_3820007  | 30.699 | 329 | 377 | 379 | 8.32E-33  | 124 | 87.27  | 79.68 |
|                          | IBTHAUMO2_v1_810008  | IBTHAUMv1_7470001  | 45.013 | 391 | 474 | 399 | 1.25E-98  | 300 | 82.49  | 94.99 |
| Toxin: antitoxin systems | IBTHAUMO2_v1_1130060 | IBTHAUMv1_13940004 | 100    | 83  | 83  | 83  | 2.73E-58  | 170 | 100.00 | 98.80 |
|                          | IBTHAUMO2_v1_990027  | IBTHAUMv1_13940004 | 34.667 | 75  | 86  | 83  | 2.83E-11  | 52  | 87.21  | 87.95 |
|                          | IBTHAUMO2_v1_570004  | IBTHAUMv1_840006   | 98.214 | 112 | 112 | 112 | 5.96E-77  | 220 | 100.00 | 99.11 |
|                          | IBTHAUMO2_v1_590016  | IBTHAUMv1_23220003 | 98.942 | 378 | 378 | 378 | 0         | 740 | 100.00 | 99.74 |
|                          | IBTHAUMO2_v1_330015  | IBTHAUMv1_1010002  | 99.091 | 330 | 377 | 330 | 0         | 655 | 87.53  | 99.70 |
|                          | IBTHAUMO2_v1_520002  | IBTHAUMv1_4560007  | 100    | 376 | 377 | 376 | 0         | 768 | 99.73  | 99.73 |
|                          | IBTHAUMO2_v1_210021  | IBTHAUMv1_6980001  | 100    | 294 | 402 | 294 | 0         | 598 | 73.13  | 99.66 |
|                          | IBTHAUMO2_v1_440006  | IBTHAUMv1_15080002 | 99.785 | 465 | 465 | 465 | 0         | 900 | 100.00 | 99.78 |
|                          | IBTHAUMO2_v1_870005  | IBTHAUMv1_5820001  | 100    | 214 | 447 | 216 | 1.21E-150 | 424 | 47.87  | 98.61 |
|                          | IBTHAUMO2_v1_940001  | IBTHAUMv1_4550011  | 100    | 418 | 419 | 465 | 0         | 835 | 99.76  | 89.68 |

**Table S3.** Expressed proteins assigned to the *I. basta* thaumarchaeote MAG ordered by NSAF value. Proteins that are encoded exclusively by *Ca. N. bastadiensis* among the AOA are labeled in orange. Proteins encoded by all AOA are labeled in blue.

| Accession            | Gene         | Description                                                                                  | AA length | NSAF  | OG Family | Presence in 454 Thaumarchaeal bin |          |          |              | Distribution of OGs**                                                         | Notes                     |
|----------------------|--------------|----------------------------------------------------------------------------------------------|-----------|-------|-----------|-----------------------------------|----------|----------|--------------|-------------------------------------------------------------------------------|---------------------------|
|                      |              |                                                                                              |           |       |           | Accession                         | maxLrap* | minLrap* | % BLASTp hit |                                                                               |                           |
| IBTHAUMO2_v1_1100065 |              | 4Fe-4S ferredoxin                                                                            | 100       | 9.23% | OG0000047 | IBTHAUMv1_12290026                | 1        | 1        | 100          | Core                                                                          |                           |
| IBTHAUMO2_v1_240128  | <i>tuf</i>   | Elongation factor 1-alpha                                                                    | 432       | 5.90% | OG0000743 | IBTHAUMv1_310002                  | 1        | 1        | 100          | Core                                                                          |                           |
| IBTHAUMO2_v1_720032  | <i>nirK</i>  | putative nitrite reductase, copper-dependent                                                 | 468       | 3.95% | OG0000247 | IBTHAUMv1_10010001                | 0.46795  | 0.99095  | 96.35        | not in <i>Ca. N. islandicus</i> and <i>Ca. C. symbiosum</i>                   |                           |
| IBTHAUMO2_v1_320009  | <i>amoB</i>  | putative archaeal ammonia monooxygenase subunit B                                            | 189       | 3.49% | OG0000306 | IBTHAUMv1_240002                  | 1        | 1        | 100          | Core                                                                          |                           |
| IBTHAUMO2_v1_950017  |              | conserved protein of unknown function                                                        | 355       | 3.34% | OG0000097 | IBTHAUMv1_4200003                 | 0.58028  | 0.78626  | 89.32        |                                                                               |                           |
| IBTHAUMO2_v1_890024  | <i>ths</i>   | Thermosome subunit                                                                           | 546       | 3.22% | OG0000022 | IBTHAUMv1_7040001                 | 1        | 1        | 99.82        | Core                                                                          |                           |
| IBTHAUMO2_v1_240148  |              | Zn-dependent oxidoreductase                                                                  | 356       | 3.09% | OG0000035 | IBTHAUMv1_16180002                | 1        | 1        | 100          | Core                                                                          |                           |
| IBTHAUMO2_v1_1130066 |              | conserved protein of unknown function                                                        | 86        | 3.07% | OG0001007 | IBTHAUMv1_620009                  | 1        | 1        | 100          |                                                                               |                           |
| IBTHAUMO2_v1_1100022 | <i>ths</i>   | Thermosome subunit                                                                           | 566       | 3.03% | OG0000022 | IBTHAUMv1_4580008                 | 1        | 1        | 99.82        | Core                                                                          |                           |
| IBTHAUMO2_v1_510038  | <i>rrp41</i> | Exosome complex component Rrp41                                                              | 243       | 2.53% | OG0000833 | IBTHAUMv1_1960004                 | 1        | 1        | 100          | Core                                                                          |                           |
| IBTHAUMO2_v1_250013  | <i>trxA</i>  | Thioredoxin 1                                                                                | 108       | 2.44% | OG0000373 | IBTHAUMv1_11050023                | 1        | 1        | 100          | Core                                                                          |                           |
| IBTHAUMO2_v1_170030  | <i>atpA</i>  | V-type ATP synthase alpha chain                                                              | 589       | 2.39% | OG0000512 | IBTHAUMv1_3990024                 | 1        | 1        | 100          | Core                                                                          |                           |
| IBTHAUMO2_v1_320010  | <i>amoC</i>  | Ammonia monooxygenase/methane monooxygenase, subunit C                                       | 187       | 2.35% | OG0000065 | IBTHAUMv1_4820001                 | 0.92118  | 1        | 100          | Core                                                                          |                           |
| IBTHAUMO2_v1_1070007 |              | Band 7 protein                                                                               | 285       | 2.31% | OG0001373 | IBTHAUMv1_16780016                | 0.8807   | 1        | 100          |                                                                               |                           |
| IBTHAUMO2_v1_1110035 | <i>psmA</i>  | Proteasome subunit alpha 2                                                                   | 240       | 1.83% | OG0000072 | IBTHAUMv1_1190006                 | 1        | 1        | 100          | Core                                                                          |                           |
| IBTHAUMO2_v1_270002  |              | protein of unknown function                                                                  | 986       | 1.74% | OG0001421 | IBTHAUMv1_16090001                | 0.91481  | 1        | 100          | All 3 sponge symbionts, 2 <i>Ca. Nitrosotaleales</i> , 1 <i>Ca. N. brevis</i> | s-layer protein family    |
| IBTHAUMO2_v1_780001  |              | exported protein of unknown function                                                         | 511       | 1.63% | OG0001421 | IBTHAUMv1_2030001                 | 0.48711  | 0.99804  | 100          | All 3 sponge symbionts, 2 <i>Ca. Nitrosotaleales</i> , 1 <i>Ca. N. brevis</i> | s-layer protein family    |
| IBTHAUMO2_v1_450045  | <i>sufC</i>  | FeS assembly ATPase SufC                                                                     | 256       | 1.55% | OG0000878 | IBTHAUMv1_9550001                 | 1        | 1        | 100          | Core                                                                          |                           |
| IBTHAUMO2_v1_1070037 |              | 4Fe-4S ferredoxin                                                                            | 181       | 1.46% | OG0000029 | IBTHAUMv1_3930011                 | 1        | 1        | 100          | Core                                                                          |                           |
| IBTHAUMO2_v1_1130095 | <i>livK</i>  | ABC-type branched-chain amino acid transport system, periplasmic component (modular protein) | 526       | 1.42% | OG0001679 | IBTHAUMv1_16960002                | 1        | 1.03137  | 93.73        | All 3 sponge symbionts, <i>N. maritimus</i> and both Nitrosocosmic spp.       |                           |
| IBTHAUMO2_v1_660006  |              | exported protein of unknown function                                                         | 510       | 1.38% | OG0001421 | IBTHAUMv1_2030001                 | 0.48902  | 1.00392  | 82.62        | All 3 sponge symbionts, 2 <i>Ca. Nitrosotaleales</i> , 1 <i>Ca. N. brevis</i> | s-layer protein family    |
| IBTHAUMO2_v1_1030029 |              | putative archaeal aspartate aminotransferase                                                 | 383       | 1.38% | OG0000543 | IBTHAUMv1_3950021                 | 1        | 1        | 100          | Core                                                                          |                           |
| IBTHAUMO2_v1_240080  |              | exported protein of unknown function                                                         | 2072      | 1.32% | OG0001466 | IBTHAUMv1_11360001                | 1        | 1        | 98.65        | <i>Ca. N. bastadiensis</i> unique                                             | DUF5011 domain-containing |
| IBTHAUMO2_v1_990028  | <i>psmA</i>  | Proteasome subunit alpha                                                                     | 244       | 1.26% | OG0000072 | IBTHAUMv1_15240015                | 1        | 1        | 100          | Core                                                                          |                           |
| IBTHAUMO2_v1_60001   |              | exported protein of unknown function                                                         | 1110      | 1.23% | OG0001421 | IBTHAUMv1_15240010                | 0.71754  | 1.05045  | 62.78        | All 3 sponge symbionts, 2 <i>Ca. Nitrosotaleales</i> , 1 <i>Ca. N. brevis</i> | s-layer protein family    |



|                      |              |                                                           |      |       |           |                    |         |         |       |                                                                                                |                                         |
|----------------------|--------------|-----------------------------------------------------------|------|-------|-----------|--------------------|---------|---------|-------|------------------------------------------------------------------------------------------------|-----------------------------------------|
| IBTHAUMO2_v1_320005  | <i>rps15</i> | 30S ribosomal protein S15                                 | 149  | 1.18% | OG0000795 | IBTHAUMv1_240006   | 1       | 1       | 99.33 | Core                                                                                           |                                         |
| IBTHAUMO2_v1_170031  | <i>atpB</i>  | V-type ATP synthase beta chain                            | 456  | 1.16% | OG0000511 | IBTHAUMv1_3990023  | 1       | 1       | 100   | Core                                                                                           |                                         |
| IBTHAUMO2_v1_980016  | <i>rpoA</i>  | DNA-directed RNA polymerase subunit A''                   | 1263 | 1.11% | OG0000600 | IBTHAUMv1_12910016 | 1       | 1       | 100   | Core                                                                                           |                                         |
| IBTHAUMO2_v1_450036  |              | protein of unknown function                               | 82   | 1.07% | OG0002396 | IBTHAUMv1_15190002 | 1       | 1       | 90.24 | Only shared b/n <i>Ca. N. bastadiensis</i> , <i>N. maritimus</i> , and <i>Ca. N. gargensis</i> |                                         |
| IBTHAUMO2_v1_950026  | <i>ftnB</i>  | putative ferritin-2                                       | 168  | 1.05% | OG0001406 | IBTHAUMv1_3240002  | 1       | 1       | 99.4  | Sporadic distribution - seems to be concentrated in the Nitrosopumiliaceae                     |                                         |
| IBTHAUMO2_v1_530013  | <i>albA</i>  | DNA/RNA-binding protein Alba (modular protein)            | 170  | 1.03% | OG0000027 | IBTHAUMv1_3270004  | 1       | 1       | 100   | Core                                                                                           |                                         |
| IBTHAUMO2_v1_980006  | <i>mdh</i>   | Malate dehydrogenase                                      | 302  | 1.02% | OG0000569 | IBTHAUMv1_4300002  | 0.91515 | 1       | 98.34 | Core                                                                                           |                                         |
| IBTHAUMO2_v1_240105  |              | conserved exported protein of unknown function            | 451  | 0.97% | OG0000059 | IBTHAUMv1_1870005  | 0.55654 | 1       | 100   |                                                                                                |                                         |
| IBTHAUMO2_v1_770040  |              | Cyclase/dehydrase                                         | 198  | 0.89% | OG0000265 | IBTHAUMv1_20630002 | 1       | 1       | 100   | Core                                                                                           |                                         |
| IBTHAUMO2_v1_980019  |              | Ribosomal protein L7Ae/L30e/S12e/Gadd45                   | 104  | 0.85% | OG0000601 | IBTHAUMv1_12970010 | 1       | 1       | 100   | Core                                                                                           |                                         |
| IBTHAUMO2_v1_1110009 |              | conserved exported protein of unknown function            | 313  | 0.84% | OG0000016 | IBTHAUMv1_920001   | 0.85942 | 1       | 99.26 | Core                                                                                           |                                         |
| IBTHAUMO2_v1_1110029 | <i>erpA</i>  | Iron-sulfur cluster insertion protein ErpA 1              | 116  | 0.76% | OG0000603 | IBTHAUMv1_18460002 | 1       | 1       | 100   | Core                                                                                           |                                         |
| IBTHAUMO2_v1_1110033 | <i>gdhA</i>  | Glutamate dehydrogenase                                   | 424  | 0.73% | OG0000604 | IBTHAUMv1_18460006 | 0.80189 | 1       | 100   | Core                                                                                           |                                         |
| IBTHAUMO2_v1_990049  | <i>rpl6</i>  | 50S ribosomal protein L6                                  | 182  | 0.72% | OG0000737 | IBTHAUMv1_4350015  | 1       | 1       | 99.45 | Core                                                                                           |                                         |
| IBTHAUMO2_v1_720011  |              | exported protein of unknown function                      | 1424 | 0.71% | OG0001466 | IBTHAUMv1_4130010  | 1       | 1       | 99.16 | <i>Ca. N. bastadiensis</i> unique                                                              |                                         |
| IBTHAUMO2_v1_470003  | <i>tbp</i>   | TATA-box-binding protein                                  | 187  | 0.71% | OG0000031 | IBTHAUMv1_12200005 | 1       | 1       | 100   | Core                                                                                           |                                         |
| IBTHAUMO2_v1_240046  |              | conserved protein of unknown function                     | 130  | 0.68% | OG0000007 | IBTHAUMv1_2100004  | 1       | 1       | 100   | only missing in <i>Ca. N. islandicus</i>                                                       |                                         |
| IBTHAUMO2_v1_980022  | <i>rps7</i>  | 30S ribosomal protein S7                                  | 199  | 0.66% | OG0000837 | IBTHAUMv1_13050003 | 1       | 1       | 100   | Core                                                                                           |                                         |
| IBTHAUMO2_v1_220008  | <i>sodA</i>  | Superoxide dismutase [Mn]                                 | 205  | 0.64% | OG0000084 | IBTHAUMv1_13830025 | 1       | 1       | 100   | Core                                                                                           |                                         |
| IBTHAUMO2_v1_260024  |              | Universal stress protein (UspA domain-containing protein) | 141  | 0.62% | OG0000011 | IBTHAUMv1_1640004  | 1       | 1       | 100   | only missing in <i>Ca. N. islandicus</i>                                                       | important for oxidative and acid stress |
| IBTHAUMO2_v1_260038  |              | Cupin 2 conserved barrel domain protein                   | 142  | 0.62% | OG0001023 | IBTHAUMv1_1140005  | 1       | 1       | 99.3  | only missing in <i>Ca. N. islandicus</i>                                                       |                                         |
| IBTHAUMO2_v1_340008  | <i>dnaK</i>  | Chaperone protein DnaK                                    | 503  | 0.61% | OG0000335 | IBTHAUMv1_11380008 | 0.75262 | 0.99801 | 100   | Core                                                                                           |                                         |
| IBTHAUMO2_v1_210018  | <i>cofD</i>  | LPPG:FO 2-phospho-L-lactate transferase                   | 306  | 0.57% | OG0000676 | IBTHAUMv1_4620004  | 1       | 1       | 100   | Core                                                                                           | F420 biosynthesis                       |
| IBTHAUMO2_v1_1110028 | <i>dnaG</i>  | DNA primase DnaG                                          | 386  | 0.57% | OG0000693 | IBTHAUMv1_2640008  | 0.80829 | 1       | 99.68 | Core                                                                                           |                                         |
| IBTHAUMO2_v1_1030019 | <i>ppi</i>   | putative peptidyl-prolyl cis-trans isomerase              | 158  | 0.56% | OG0000324 | IBTHAUMv1_12830004 | 1       | 1       | 100   | only missing in <i>Ca. N. islandicus</i>                                                       |                                         |
| IBTHAUMO2_v1_210017  |              | conserved exported protein of unknown function            | 448  | 0.49% | OG0000096 | IBTHAUMv1_1340002  | 1       | 1       | 100   | Core                                                                                           |                                         |
| IBTHAUMO2_v1_320015  |              | Alkyl hydroperoxide reductase                             | 182  | 0.48% | OG0000941 | IBTHAUMv1_2320004  | 1       | 1       | 99.45 | only missing in <i>Ca. N. salalaria</i>                                                        |                                         |
| IBTHAUMO2_v1_240129  | <i>fbp</i>   | bifunctional fructose-1,6-bisphosphatase                  | 376  | 0.47% | OG0000417 | IBTHAUMv1_310001   | 0.97606 | 1       | 99.46 | Core                                                                                           |                                         |
| IBTHAUMO2_v1_1130058 | <i>pepA</i>  | putative leucyl aminopeptidase                            | 477  | 0.46% | OG0001191 | IBTHAUMv1_13940006 | 1       | 1       | 99.79 | missing in <i>Ca. N. islandicus</i> and all <i>Ca. Nitrosotaleales</i>                         |                                         |
| IBTHAUMO2_v1_720005  | <i>rpoE</i>  | DNA-directed RNA polymerase subunit E'                    | 193  | 0.46% | OG0000408 | IBTHAUMv1_4130016  | 1       | 1       | 100   | Core                                                                                           |                                         |

|                      |                  |                                                                                              |      |       |           |                    |         |         |       |                                                                                   |                                                                  |
|----------------------|------------------|----------------------------------------------------------------------------------------------|------|-------|-----------|--------------------|---------|---------|-------|-----------------------------------------------------------------------------------|------------------------------------------------------------------|
| IBTHAUMO2_v1_1130033 | <i>accC/pccC</i> | acetyl-CoA/propionyl-CoA carboxylase, biotin carboxylase subunit                             | 485  | 0.45% | OG0000362 | IBTHAUMv1_13940030 | 1       | 1       | 100   | Core                                                                              |                                                                  |
| IBTHAUMO2_v1_720031  |                  | NAD-binding D-isomer specific 2-hydroxyacid dehydrogenase                                    | 310  | 0.43% | OG0000385 | IBTHAUMv1_4660002  | 1       | 1       | 97.42 | Core                                                                              |                                                                  |
| IBTHAUMO2_v1_990024  | <i>fusA</i>      | Elongation factor 2                                                                          | 730  | 0.42% | OG0000645 | IBTHAUMv1_16760020 | 1       | 1       | 99.73 | Core                                                                              |                                                                  |
| IBTHAUMO2_v1_720043  |                  | exported protein of unknown function                                                         | 1462 | 0.42% | OG0001466 | IBTHAUMv1_5230001  | 0.70588 | 0.99807 | 95.35 | Ca. N. bastadiensis unique                                                        |                                                                  |
| IBTHAUMO2_v1_1100034 |                  | Peptidyl-prolyl cis-trans isomerase                                                          | 533  | 0.41% | OG0000003 | IBTHAUMv1_17580009 | 1       | 1       | 99.25 | only missing in both Nitrosocosmicus spp.                                         |                                                                  |
| IBTHAUMO2_v1_40002   |                  | conserved protein of unknown function                                                        | 976  | 0.41% | OG0000006 | IBTHAUMv1_3870008  | 0.61226 | 1.03381 | 75.22 | only missing in both Nitrosocosmicus spp.                                         | s-layer protein family                                           |
| IBTHAUMO2_v1_240132  |                  | conserved protein of unknown function                                                        | 217  | 0.41% | OG0000436 | IBTHAUMv1_5220002  | 1       | 1       | 100   | Core                                                                              | contains PF01865 domain - putative phosphate transport regulator |
| IBTHAUMO2_v1_1080008 |                  | exported protein of unknown function                                                         | 557  | 0.39% | OG0001421 | IBTHAUMv1_15240001 | 0.33504 | 0.93896 | 62.33 | All 3 sponge symbionts, 2 Ca. Nitrosotaleales, 1 Ca. N. brevis                    | s-layer protein family                                           |
| IBTHAUMO2_v1_240136  |                  | Short-chain dehydrogenase/reductase SDR                                                      | 574  | 0.38% | OG0000810 | IBTHAUMv1_1110007  | 1       | 1       | 99.48 | Core                                                                              |                                                                  |
| IBTHAUMO2_v1_980023  |                  | membrane protein of unknown function                                                         | 586  | 0.38% | OG0011727 | IBTHAUMv1_12910009 | 1       | 1       | 99.83 | singleton                                                                         |                                                                  |
| IBTHAUMO2_v1_1110030 |                  | 3-hydroxypropionyl-CoA dehydratase/Crotonyl-CoA hydratase [[S]-3-hydroxybutyryl-CoA forming] | 252  | 0.35% | OG0000227 | IBTHAUMv1_18460003 | 1       | 1       | 100   | Core                                                                              |                                                                  |
| IBTHAUMO2_v1_510039  | <i>rrp42</i>     | Exosome complex component Rrp42                                                              | 270  | 0.33% | OG0000834 | IBTHAUMv1_1960005  | 1       | 1       | 100   | Core                                                                              |                                                                  |
| IBTHAUMO2_v1_1100023 | <i>glyA</i>      | Serine hydroxymethyltransferase                                                              | 448  | 0.29% | OG0000541 | IBTHAUMv1_4580009  | 0.97545 | 1       | 100   | Core                                                                              |                                                                  |
| IBTHAUMO2_v1_940015  | <i>sucD</i>      | succinyl-CoA synthetase, NAD(P)-binding, alpha subunit                                       | 302  | 0.29% | OG0000763 | IBTHAUMv1_330006   | 1       | 1       | 99.34 | Core                                                                              |                                                                  |
| IBTHAUMO2_v1_590109  | <i>sufD</i>      | FeS assembly protein                                                                         | 461  | 0.29% | OG0000995 | IBTHAUMv1_4640007  | 1       | 1       | 100   | only missing in Ca. N. salalaria                                                  |                                                                  |
| IBTHAUMO2_v1_800011  |                  | putative aldolase                                                                            | 314  | 0.28% | OG0000682 | IBTHAUMv1_14600002 | 1       | 1.0129  | 98.73 | Core                                                                              | putatively functional in E.C. 4.1.2.13                           |
| IBTHAUMO2_v1_590122  | <i>hemB</i>      | Delta-aminolevulinic acid dehydratase                                                        | 321  | 0.27% | OG0000183 | IBTHAUMv1_830005   | 0.85981 | 1       | 100   | Core                                                                              |                                                                  |
| IBTHAUMO2_v1_260012  | <i>trxB</i>      | Thioredoxin reductase                                                                        | 327  | 0.27% | OG0000820 | IBTHAUMv1_4840006  | 0.93162 | 1       | 99.69 | Core                                                                              |                                                                  |
| IBTHAUMO2_v1_1080004 |                  | conserved exported protein of unknown function                                               | 508  | 0.26% | OG0000016 | IBTHAUMv1_16190003 | 1       | 1       | 99.41 | Core                                                                              |                                                                  |
| IBTHAUMO2_v1_170024  |                  | H(+)-transporting two-sector ATPase                                                          | 340  | 0.26% | OG0000137 | IBTHAUMv1_2710003  | 1       | 1       | 100   | Core                                                                              |                                                                  |
| IBTHAUMO2_v1_950011  | <i>aroB</i>      | 3-dehydroquinate synthase                                                                    | 341  | 0.26% | OG0000823 | IBTHAUMv1_560007   | 1       | 1       | 96.19 | Core                                                                              | tyrosine, tryptophan, phe synthesis                              |
| IBTHAUMO2_v1_170028  | <i>atpI</i>      | V-type ATP synthase subunit I                                                                | 694  | 0.25% | OG0001210 | IBTHAUMv1_15570002 | 0.62104 | 1       | 100   | Core                                                                              |                                                                  |
| IBTHAUMO2_v1_1110031 |                  | 3-Hydroxypropionyl-CoA synthetase                                                            | 704  | 0.25% | OG0000680 | IBTHAUMv1_18460004 | 1       | 1       | 100   | Core                                                                              |                                                                  |
| IBTHAUMO2_v1_770013  |                  | AAA family ATPase, CDC48 subfamily                                                           | 728  | 0.24% | OG0000098 | IBTHAUMv1_11430014 | 1       | 1       | 100   | Core                                                                              |                                                                  |
| IBTHAUMO2_v1_300003  |                  | Redoxin domain-containing protein                                                            | 371  | 0.24% | OG0000167 | IBTHAUMv1_13230016 | 1       | 1       | 99.73 | only missing in Ca. N. islandicus                                                 |                                                                  |
| IBTHAUMO2_v1_470029  |                  | Beta-lactamase domain-containing protein                                                     | 421  | 0.21% | OG0000769 | IBTHAUMv1_1130003  | 1       | 1       | 99.76 | Core                                                                              |                                                                  |
| IBTHAUMO2_v1_260042  | <i>hemL</i>      | Glutamate-1-semialdehyde 2,1-aminomutase 2                                                   | 441  | 0.20% | OG0000389 | IBTHAUMv1_13740001 | 0.92517 | 0.99756 | 99.75 | Core                                                                              | F430/tetrapyrrole/B12 biosynthesis                               |
| IBTHAUMO2_v1_980015  | <i>rpoB</i>      | DNA-directed RNA polymerase subunit B                                                        | 1115 | 0.20% | OG0000599 | IBTHAUMv1_1480002  | 0.71031 | 0.99874 | 99.87 | Core                                                                              |                                                                  |
| IBTHAUMO2_v1_370006  | <i>cysM</i>      | Cysteine synthase                                                                            | 492  | 0.18% | OG0001268 | IBTHAUMv1_12200010 | 1       | 1       | 98.78 | missing in Ca. N. islandicus, both Nitrosocosmicus spp., all Ca. Nitrosotenuaceae |                                                                  |

|                     |             |                                                                     |      |       |           |                    |         |         |       |                                                                                                                      |                                                                             |
|---------------------|-------------|---------------------------------------------------------------------|------|-------|-----------|--------------------|---------|---------|-------|----------------------------------------------------------------------------------------------------------------------|-----------------------------------------------------------------------------|
| IBTHAUMO2_v1_690011 |             | conserved exported protein of unknown function                      | 492  | 0.18% | OG0000003 | IBTHAUMv1_11050007 | 1       | 1       | 99.59 | not in both Nitrosocosmicus and many AOA have multiple copies                                                        | SSF51004: Cytochrome cd1-nitrite reductase-like, haem d1 domain superfamily |
| IBTHAUMO2_v1_320044 | <i>aco</i>  | Aconitate hydratase                                                 | 745  | 0.18% | OG0000268 | IBTHAUMv1_4090010  | 1       | 1       | 99.46 | Core                                                                                                                 |                                                                             |
| IBTHAUMO2_v1_370005 |             | von Willebrand factor type A                                        | 498  | 0.18% | OG0000623 | IBTHAUMv1_12200011 | 0.58635 | 1       | 99.66 | Core                                                                                                                 | COG4548: P, Nitric oxide reductase activation protein                       |
| IBTHAUMO2_v1_330024 | <i>pstS</i> | ABC-type phosphate transport system periplasmic component (PstS)    | 508  | 0.17% | OG0000113 | IBTHAUMv1_17840008 | 1       | 1       | 99.41 | missing in <i>Ca. N. salaria</i> , <i>Ca. N. koreensis</i> AR2, <i>Ca. N. sediminis</i> , and <i>Ca. N. catalina</i> |                                                                             |
| IBTHAUMO2_v1_170026 | <i>amt2</i> | Ammonium transporter                                                | 520  | 0.17% | OG0000221 | IBTHAUMv1_15380013 | 0.96923 | 1       | 100   | missing in both Nitrosocosmicus spp.                                                                                 |                                                                             |
| IBTHAUMO2_v1_620022 |             | protein of unknown function                                         | 1844 | 0.17% | OG0001466 | IBTHAUMv1_12370012 | 0.85016 | 1       | 98.86 | <i>Ca. N. bastadiensis</i> unique                                                                                    | DUF5011 domain-containing                                                   |
| IBTHAUMO2_v1_960004 | <i>ths</i>  | Thermosome subunit                                                  | 560  | 0.16% | OG0002000 | IBTHAUMv1_4580008  | 0.89223 | 0.90179 | 42.57 |                                                                                                                      |                                                                             |
| IBTHAUMO2_v1_530015 | <i>sdhA</i> | Succinate dehydrogenase or fumarate reductase, flavoprotein subunit | 570  | 0.15% | OG0000437 | IBTHAUMv1_4000002  | 0.92632 | 1       | 98.48 | Core                                                                                                                 |                                                                             |
| IBTHAUMO2_v1_590087 |             | Type III restriction-modification system methyltransferase          | 593  | 0.15% | OG0001596 | IBTHAUMv1_9460007  | 0.95058 | 0.97302 | 31.37 |                                                                                                                      |                                                                             |
| IBTHAUMO2_v1_240089 | <i>ppdk</i> | Pyruvate, phosphate dikinase                                        | 884  | 0.10% | OG0001061 | IBTHAUMv1_4310008  | 1       | 1       | 100   |                                                                                                                      |                                                                             |
| IBTHAUMO2_v1_700001 |             | protein of unknown function                                         | 3094 | 0.10% | OG0001466 | IBTHAUMv1_20360004 | 0.50517 | 0.96125 | 99.42 | <i>Ca. N. bastadiensis</i> unique                                                                                    | DUF5011 domain-containing                                                   |
| IBTHAUMO2_v1_880008 |             | exported protein of unknown function                                | 2027 | 0.04% | OG0000017 | IBTHAUMv1_19190004 | 0.32215 | 0.88243 | 46.86 |                                                                                                                      | putative M72 metalloendopeptidase                                           |

\*These values are ratios of alignment lengths computed for each comparison using the BLAST software :

$$\text{minLrap} = \text{Lmatch}/\text{min}(\text{Lprot1}, \text{Lprot2})$$

$$\text{maxLrap} = \text{Lmatch}/\text{max}(\text{Lprot1}, \text{Lprot2})$$

where Lmatch = length of the match, Lprot1 = length of protein 1, Lprot2 = length of protein 2

**if minLrap=1 and maxLrap=1 =>** the 2 proteins both align on their whole length

**if minLrap=1 and maxLrap<1 =>** one of the proteins is longer than the other, or the alignment is partial.

singletons refer to genes which did not have a hit above an expected threshold in OrthoFinder amongst all queried sequences

\*\*If certain AOA do not have members in certain orthologous groups it does not mean that a more distant homologous gene is not present

**Table S4.** Comparison of net nitrite formation and nitrification rates from our study with previously published sponge studies.

| Sponge species                                                                                                                                                     | Net nitrification rates<br>[ $\mu\text{mol N (cm}^{-3}\text{ or g}^{-1}\text{ wet wt.) day}^{-1}$ ] | Net nitrite formation<br>rates [ $\mu\text{mol N (cm}^{-3}\text{ or g}^{-1}\text{ wet wt.) day}^{-1}$ ] | Marine area, depth,<br>and season                                       | Experimental Setup                                                                              | AOB/AOA Diversity                                                                                                 | Reference                                                    |
|--------------------------------------------------------------------------------------------------------------------------------------------------------------------|-----------------------------------------------------------------------------------------------------|---------------------------------------------------------------------------------------------------------|-------------------------------------------------------------------------|-------------------------------------------------------------------------------------------------|-------------------------------------------------------------------------------------------------------------------|--------------------------------------------------------------|
| <i>Anthosigmella varians</i>                                                                                                                                       | 0.003 – 0.105 ( $\text{g}^{-1*}$ )                                                                  | N.D.                                                                                                    | Caribbean coral reef<br>(6m)                                            | 4h - 2.25 L batch incubations<br>+/- light and 5 $\mu\text{M NH}_4^+$                           | N.D.                                                                                                              | Corredor <i>et al.</i> , 1988                                |
| <i>Chondrilla nucula</i>                                                                                                                                           | 1.03 – 1.49 $\diamond$ ( $\text{g}^{-1*}$ )                                                         |                                                                                                         |                                                                         |                                                                                                 |                                                                                                                   |                                                              |
| <i>Chondrilla nucula</i>                                                                                                                                           | 0.864 – 6.36 ( $\text{g}^{-1*}$ )                                                                   | 0.014 – 0.24 ( $\text{g}^{-1*}$ )                                                                       | Caribbean coral reef<br>(20-40m) and<br>mangroves (1-3m);<br>June-Sept. | 6 to 12h – 3 and 20L batch inc.,<br>+/- light                                                   | N.D.                                                                                                              | Diaz & Ward, 1997                                            |
| <i>Pseudaxinella zeai</i>                                                                                                                                          | 0 – 2.47 ( $\text{g}^{-1*}$ )                                                                       | 0 – 0.048 ( $\text{g}^{-1*}$ )                                                                          |                                                                         |                                                                                                 |                                                                                                                   |                                                              |
| <i>Oligoceras violacea</i>                                                                                                                                         | 0 – 1.37 ( $\text{g}^{-1*}$ )                                                                       | 0.408 – 1.39 ( $\text{g}^{-1*}$ )                                                                       |                                                                         |                                                                                                 |                                                                                                                   |                                                              |
| <i>Plakortis halichondroides</i>                                                                                                                                   | 0 – 0.768 ( $\text{g}^{-1*}$ )                                                                      | 0 – 0.192 ( $\text{g}^{-1*}$ )                                                                          |                                                                         |                                                                                                 |                                                                                                                   |                                                              |
| <i>Alpysina aerophoba</i>                                                                                                                                          | 3.6 – 9.2 $\diamond$ ( $\text{g}^{-1}$ )                                                            | N.D.                                                                                                    | Med. Sea, 2-20m;                                                        | 9 to 28h - 3L batch, +/- 100 or<br>200 $\mu\text{M NH}_4^+$                                     | $\beta$ -AOB 16S – 9 OTUs<br>– 1 OTU                                                                              | Bayer <i>et al.</i> , 2007                                   |
| <i>Dysidea avara</i>                                                                                                                                               | 0                                                                                                   |                                                                                                         |                                                                         |                                                                                                 |                                                                                                                   |                                                              |
| <i>Chondrosia reniformis</i>                                                                                                                                       | ~0.3 ( $\text{g}^{-1}$ )                                                                            |                                                                                                         |                                                                         |                                                                                                 |                                                                                                                   |                                                              |
| <i>Alpysina aerophoba</i>                                                                                                                                          | 0.214 – 0.826 ( $\text{g}^{-1*}$ )                                                                  | N.D.                                                                                                    | Med. Sea, 2-15m<br>April - Sept.                                        | 21 to 28h – 3L batch inc., +/-<br>100 or 200 $\mu\text{M NH}_4^+$<br>+/- nitrapyrin             | A- and $\beta$ - <i>amoA</i> /16S – 5, 7, 9 OTUs                                                                  | Bayer <i>et al.</i> , 2008                                   |
| <i>Aplysina aerophoba</i>                                                                                                                                          | 1.13 ( $\text{g}^{-1*}$ )                                                                           | N.D.                                                                                                    | Med. Sea, 10-20m;                                                       | 6h – 7L batch inc.                                                                              |                                                                                                                   | Jiménez & Ribes, 2007; Ribes<br><i>et al.</i> , 2012         |
| <i>Agelas oroides</i>                                                                                                                                              | 0.875 ( $\text{g}^{-1*}$ )                                                                          |                                                                                                         | Sept. for all except for<br><i>A. oroides</i> (July)                    |                                                                                                 | 6 <i>A-amoA</i> OTUs in 3 clust.<br>12 $\beta$ - <i>amoA</i> OTUs in 3 clust.<br>83 $\gamma$ - <i>amoA</i> clones |                                                              |
| <i>Dysidea avara</i>                                                                                                                                               | N.S.                                                                                                |                                                                                                         |                                                                         |                                                                                                 |                                                                                                                   |                                                              |
| <i>Chondrosia reniformis</i>                                                                                                                                       | 1.68 ( $\text{g}^{-1*}$ )                                                                           |                                                                                                         |                                                                         |                                                                                                 |                                                                                                                   |                                                              |
| <i>Axinella polypoides</i>                                                                                                                                         | 0.452 ( $\text{g}^{-1*}$ )                                                                          |                                                                                                         |                                                                         |                                                                                                 |                                                                                                                   |                                                              |
| <i>Ircinia oros</i>                                                                                                                                                | 0.544 ( $\text{g}^{-1*}$ )                                                                          |                                                                                                         |                                                                         |                                                                                                 |                                                                                                                   |                                                              |
| <i>Aplysina cauliformis</i>                                                                                                                                        | 4.08 ( $\text{g}^{-1*}$ )                                                                           | N.D.                                                                                                    | Florida Keys, ~4m                                                       | 6 to 8h – 2-4L batches; <i>in situ</i><br>sampling                                              | N.D.                                                                                                              | Southwell <i>et al.</i> , 2008                               |
| <i>Smenospongia aurea</i>                                                                                                                                          | 4.32 ( $\text{g}^{-1*}$ )                                                                           |                                                                                                         |                                                                         |                                                                                                 |                                                                                                                   |                                                              |
| 7 other species: <i>A. archeri</i> ,<br><i>A. lacunose</i> , <i>I. felix</i> , <i>I. strobilina</i> ,<br><i>P. crassa</i> , <i>V. rigidia</i> , and <i>X. muta</i> | +++++                                                                                               |                                                                                                         |                                                                         |                                                                                                 |                                                                                                                   |                                                              |
| <i>Chondrosia reniformis</i> ,<br><i>Dysidea avara</i>                                                                                                             | 0.176 ( $\text{g}^{-1}$ )<br>0.294 ( $\text{g}^{-1}$ )                                              | 0.016 ( $\text{g}^{-1}$ )<br>0.016 ( $\text{g}^{-1}$ )                                                  | Med. Sea, 10-15m                                                        | 24h – 1L batches with 10 $\mu\text{M}$<br>$\text{NH}_4^+$                                       | 1 <i>A-amoA</i> OTU                                                                                               | Schläppy <i>et al.</i> , 2010                                |
| <i>Phakellia ventilabrum</i>                                                                                                                                       | 0.14 – 2.26 ( $\text{g}^{-1}\circ$ )                                                                | 0 – 0.192 ( $\text{g}^{-1}\circ$ )                                                                      | Norwegian coast<br>(fjords), 200-300m;                                  | 24 to 48 h in 500 to 900 mL<br>batches with 10-12 $\mu\text{M NH}_4^+$                          | 3 <i>A-amoA</i> OTUs<br>3 <i>A-amoA</i> OTUs<br>1 <i>A-amoA</i> OTU                                               | Radax <i>et al.</i> , 2012; Hoffmann<br><i>et al.</i> , 2009 |
| <i>Antho dichotoma</i>                                                                                                                                             | 0.                                                                                                  | 0.360 ( $\text{g}^{-1}\circ$ )                                                                          | Mar.-Nov.                                                               |                                                                                                 |                                                                                                                   |                                                              |
| <i>Geodia barretti</i>                                                                                                                                             | 0.679 ( $\text{g}^{-1}\circ$ )                                                                      | 0.180 ( $\text{g}^{-1}\circ$ )                                                                          |                                                                         |                                                                                                 |                                                                                                                   |                                                              |
| <i>Ianthella basta</i>                                                                                                                                             | 1.67 – 11.3 ( $\text{g}^{-1}$ )<br>1.54 – 13.3 $\diamond$ ( $\text{g}^{-1}$ )                       | 0.64 – 6.07 ( $\text{g}^{-1}$ )<br>0.35 – 10.36 $\diamond$ ( $\text{g}^{-1}$ )                          | Coral Sea, Australia,<br>10 m; Sept. – Oct.                             | 7- day long 24 h batch<br>incubations in 1.74 L<br>+/- 25, 100 $\mu\text{M NH}_4^+$<br>+/- PTIO | 1 <i>A-amoA</i> OTU                                                                                               | This study                                                   |

(\* ) signifies that sponge dry wt.  $\text{g}^{-1}$  was converted by assuming dry weight = 10% of wet weight while a ( $\circ$ ) signifies that sponge  $\text{cm}^{-3}$  was converted by assuming 1  $\text{cm}^3$  sponge = 1.2 g wet weight sponge (Schläppy *et al.*, 2010). A ( $\diamond$ ) denotes that the rate is a potential rate (i.e. with added ammonium). A (+) indicates positive  $\text{NO}_x^-$  production where quantity was not assessed. “A-,  $\beta$ - , and  $\gamma$ -*amoA*” refer to archaeal, betaproteobacterial and gammaproteobacterial *amoA* OTUs, respectively.

**Table S5.** AOA used for comparative genome analyses.

| Organism/Name                                                | Assembly Accession     | doi                                                                                                  | Size (Mb) | GC%  | Status         | BioProject Accession | BioSample Accession | Strain | Completeness | Contamination |
|--------------------------------------------------------------|------------------------|------------------------------------------------------------------------------------------------------|-----------|------|----------------|----------------------|---------------------|--------|--------------|---------------|
| <i>Candidatus Nitrosocaldus icelandicus</i>                  | GCF_002906225.1        | doi: <a href="https://doi.org/10.1101/235028">https://doi.org/10.1101/235028</a>                     | 1.62      | 41.5 | Complete Genom | PRJNA413650          | SAMN07759886        | 3F     | 100          | 0             |
| <i>Nitrosopumilus maritimus</i> SCM1                         | GCA_000018465.1        | doi: <a href="https://doi.org/10.1073/pnas.0913533107">10.1073/pnas.0913533107</a>                   | 1.65      | 34.2 | Complete Genom | PRJNA19265           | SAMN00000032        | SCM1   | 100          | 0.97          |
| <i>Candidatus Cenarchaeum symbiosum</i> A                    | GCA_000200715.1        | doi: <a href="https://doi.org/10.1073/pnas.0608549103">10.1073/pnas.0608549103</a>                   | 2.05      | 57.4 | Chromosome     | PRJNA202             | SAMN02744041        | -      | 99.03        | 0             |
| <i>Candidatus Nitrosoarchaeum limnia</i> SFB1                | GCA_000204585.1        | doi: <a href="https://doi.org/10.1371/journal.pone.0016626">10.1371/journal.pone.0016626</a>         | 1.77      | 32.6 | Chromosome     | PRJNA52465           | SAMN02471010        | SFB1   | 98.06        | 0             |
| <i>Candidatus Nitrosoarchaeum koreensis</i> MY1              | GCA_000220175.2        | doi: <a href="https://doi.org/10.1128/JB.05717-11">10.1128/JB.05717-11</a>                           | 1.61      | 32.7 | Contig         | PRJNA67913           | SAMN02470178        | MY1    | 100          | 0             |
| <i>Candidatus Nitrosopumilus salaria</i> BD31                | GCA_000242875.3        | doi: <a href="https://doi.org/10.1128/JB.00013-12">10.1128/JB.00013-12</a>                           | 1.57      | 33.8 | Contig         | PRJNA50075           | SAMN00016669        | BD31   | 92.39        | 1.94          |
| <i>Candidatus Nitrosopumilus koreensis</i> AR1               | GCA_000299365.1        | doi: <a href="https://doi.org/10.1128/JB.01857-12">10.1128/JB.01857-12</a>                           | 1.64      | 34.2 | Complete Genom | PRJNA174387          | SAMN02603137        | AR1    | 94.66        | 0             |
| <i>Candidatus Nitrosopumilus sediminis</i>                   | GCA_000299395.1        | doi: <a href="https://doi.org/10.1128/JB.01869-12">10.1128/JB.01869-12</a>                           | 1.69      | 33.6 | Complete Genom | PRJNA174388          | SAMN02603138        | AR2    | 97.09        | 0             |
| <i>Candidatus Nitrososphaera gargensis</i> Ga9.2             | GCA_000303155.1        | doi: <a href="https://doi.org/10.1111/j.1462-2920.2012.02893.x">10.1111/j.1462-2920.2012.02893.x</a> | 2.83      | 48.3 | Complete Genom | PRJNA60505           | SAMN02603264        | -      | 100          | 2.91          |
| <i>Candidatus Nitrosotenuis chungbukensis</i>                | GCA_000685395.1        | doi: <a href="https://doi.org/10.1128/AEM.03730-13">10.1128/AEM.03730-13</a>                         | 1.76      | 41.8 | Contig         | PRJNA210247          | SAMN02767256        | MY2    | 99.03        | 0.97          |
| <i>Nitrososphaera viennensis</i> EN76                        | GCA_000698785.1        | doi: <a href="https://doi.org/10.1099/ij.s.0.063172-0">10.1099/ij.s.0.063172-0</a>                   | 2.53      | 52.7 | Complete Genom | PRJEA60103           | SAMN02721150        | EN76   | 100          | 0.97          |
| <i>Candidatus Nitrosotenuis uzonensis</i> N4                 | GCA_000723185.1        | doi: <a href="https://doi.org/10.1371/journal.pone.0080835">10.1371/journal.pone.0080835</a>         | 1.64      | 42.2 | Contig         | PRJEB4650            | SAMEA3139018        | N4     | 100          | 0.97          |
| <i>Candidatus Nitrososphaera evergladensis</i> SR1           | GCA_000730285.1        | doi: <a href="https://doi.org/10.1371/journal.pone.0101648">10.1371/journal.pone.0101648</a>         | 2.95      | 50.1 | Complete Genom | PRJNA235208          | SAMN03081530        | -      | 100          | 2.91          |
| <i>Candidatus Nitrosocosmicus oleophilus</i>                 | GCA_000802205.2        | doi: <a href="https://doi.org/10.1111/1758-2229.12477">10.1111/1758-2229.12477</a>                   | 3.43      | 34.1 | Complete Genom | PRJNA210256          | SAMN03074222        | MY3    | 98.06        | 0.97          |
| <i>Candidatus Nitrosopelagicus brevis</i>                    | GCA_000812185.1        | doi: <a href="https://doi.org/10.1073/pnas.1416223112">10.1073/pnas.1416223112</a>                   | 1.23      | 33.2 | Complete Genom | PRJNA223412          | SAMN03273964        | CN25   | 99.51        | 0             |
| <i>Candidatus Nitrosopumilus piranensis</i>                  | GCA_000875775.1        | doi: <a href="https://doi.org/10.1038/ismej.2015.200">10.1038/ismej.2015.200</a>                     | 1.71      | 33.8 | Complete Genom | PRJNA269924          | SAMN03257648        | D3C    | 100          | 0.97          |
| <i>Candidatus Nitrosotenuis cloacae</i>                      | GCA_000955905.3        | doi: <a href="https://doi.org/10.1038/srep23747">10.1038/srep23747</a>                               | 1.62      | 41.0 | Complete Genom | PRJNA272771          | SAMN03286947        | SAT1   | 100          | 1.94          |
| <i>Candidatus Nitrosopumilus adriaticus</i>                  | GCA_000956175.1        | doi: <a href="https://doi.org/10.1038/ismej.2015.200">10.1038/ismej.2015.200</a>                     | 1.80      | 33.4 | Complete Genom | PRJNA269341          | SAMN03253153        | NF5    | 100          | 0             |
| <i>Candidatus Nitrosopumilus</i> sp. Nsub (glass sponge MAG) | GCA_001541925.1        | doi: <a href="https://doi.org/10.1128/mSystems.00184-16">10.1128/mSystems.00184-16</a>               | 1.38      | 31.4 | Contig         | PRJNA308059          | SAMN04386402        | Nsub   | 100          | 0             |
| <i>Candidatus Nitrosocosmicus exaquare</i>                   | GCA_001870125.1        | doi: <a href="https://doi.org/10.1038/ismej.2016.192">10.1038/ismej.2016.192</a>                     | 2.99      | 33.9 | Complete Genom | PRJNA317395          | SAMN04606696        | G61    | 99.03        | 2.91          |
| <i>Candidatus Nitrosomarinus catalina</i>                    | GCA_002156965.1        | doi: <a href="https://doi.org/10.1111/1462-2920.13768">10.1111/1462-2920.13768</a>                   | 1.36      | 31.4 | Complete Genom | PRJNA341864          | SAMN05730076        | SPOT01 | 100          | 0             |
| <i>Candidatus Nitrosotenuis aquarius</i> AQ6f                | GCA_002787055.1        | doi: <a href="https://doi.org/10.1128/AEM.01430-18">10.1128/AEM.01430-18</a>                         | 1.70      | 42.2 | Complete Genom | PRJNA406986          | SAMN07637255        | AQ6F   | 99.68        | 1.94          |
| <i>Candidatus Nitrosotalea devanaterra</i>                   | GCA_900065925.1        | doi: <a href="https://doi.org/10.1128/AEM.04031-15">10.1128/AEM.04031-15</a>                         | 1.81      | 37.1 | Complete Genom | PRJEB10948           | SAMEA3577360        | -      | 98.54        | 0             |
| <i>Candidatus Nitrosotalea sinensis</i> Nd2                  | GCA_900143675.1        | doi: <a href="https://doi.org/10.1111/1462-2920.13971">10.1111/1462-2920.13971</a>                   | 1.60      | 37.4 | Contig         | PRJEB15449           | SAMEA20449918       | -      | 99.51        | 0.97          |
| <i>Candidatus Nitrosotalea bavarica</i> SbT1                 | GCA_900167955.1        | doi: <a href="https://doi.org/10.1111/1462-2920.13971">10.1111/1462-2920.13971</a>                   | 1.55      | 36.0 | Scaffold       | PRJEB15449           | SAMEA101071168      | -      | 97.57        | 1.94          |
| <i>Candidatus Nitrosotalea okcheonensis</i> CS               | GCA_900177045.1        | doi: <a href="https://doi.org/10.1111/1462-2920.13971">10.1111/1462-2920.13971</a>                   | 1.97      | 37.5 | Chromosome     | PRJEB15449           | SAMEA20449168       | -      | 99.51        | 0             |
| CcThau Ga0078905 (Sponge MAG)                                | IMG_2626541593_protein | doi: <a href="https://doi.org/10.1038/ismej.2017.25">10.1038/ismej.2017.25</a>                       | 2.16      | 38.4 | Contig         | NA                   | NA                  | -      | 97.12        | 4.01          |
| <i>Candidatus Nitrosospongia bastadiensis</i>                | NA                     | This publication                                                                                     | 1.99      | 64.8 | Scaffold       | PRJEB29556           | SAMEA5126984        | O2     | 99.03        | 0.97          |

## References

- 155 Bayer, K., Schmitt, S., and Hentschel, U. (2007) Microbial nitrification in Mediterranean sponges: possible involvement of ammonium-oxidizing *Betaproteobacteria*. In *Porifera Research: Biodiversity, Innovation, Sustainability*. Custódio, M., Lôbo-Hajdu, G., Hajdu, E., and Muricy, G. (eds). Série Livros. Rio de Janeiro, Brazil: Museu Nacional, pp. 165–171.
- 160 Bayer, K., Schmitt, S., and Hentschel, U. (2008) Physiology, phylogeny and *in situ* evidence for bacterial and archaeal nitrifiers in the marine sponge *Aplysina aerophoba*. *Environ Microbiol* **10**: 2942–2955.
- Berger, S.A., Krompass, D., and Stamatakis, A. (2011) Performance, accuracy, and web Server for evolutionary placement of short sequence reads under maximum-likelihood. *Syst Biol* **60**: 291–302.
- 165 Blatch, G.L. and Lässle, M. (1999) The tetratricopeptide repeat: a structural motif mediating protein-protein interactions. *Bioessays* **21**: 932–939.
- Callebaut, I., Mornon, J.-P., Gilgès, D., and Vigon, I. (2000) HYR, an extracellular module involved in cellular adhesion and related to the immunoglobulin-like fold. *Protein Sci* **9**: 1382–1390.
- 170 Camacho, C., Coulouris, G., Avagyan, V., Ma, N., Papadopoulos, J., Bealer, K., and Madden, T.L. (2009) BLAST+: architecture and applications. *BMC Bioinformatics* **10**: 421.
- Capella-Gutierrez, S., Silla-Martinez, J.M., and Gabaldon, T. (2009) trimAl: a tool for automated alignment trimming in large-scale phylogenetic analyses. *Bioinformatics* **25**: 1972–1973.
- 175 Cort, J.R., Yee, A., Edwards, A.M., Arrowsmith, C.H., and Kennedy, M.A. (2000) Structure-based functional classification of hypothetical protein MTH538 from *Methanobacterium thermoautotrophicum*. *J Mol Biol* **302**: 189–203.
- Corredor, J.E., Wilkinson, C.R., Vicente, V.P., Morell, J.M., and Otero, E. (1988) Nitrate release by Caribbean reef sponges. *Limnol Oceanogr* **33**: 114–120.
- 180 Diaz, M. and Ward, B. (1997) Sponge-mediated nitrification in tropical benthic communities. *Mar Ecol Prog Ser* **156**: 97–107.
- Doron, S., Melamed, S., Ofir, G., Leavitt, A., Lopatina, A., Keren, M., *et al.* (2018) Systematic discovery of antiphage defense systems in the microbial pangenome. *Science* **359**: eaar4120.

- 185 Fan, L., Reynolds, D., Liu, M., Stark, M., Kjelleberg, S., Webster, N.S., and Thomas, T. (2012) Functional equivalence and evolutionary convergence in complex communities of microbial sponge symbionts. *Proc Natl Acad Sci USA* **109**: E1878–E1887.
- Foerster, K.U., von Mering, C., Hooper, S.D., and Bork, P. (2005) Environments shape the nucleotide composition of genomes. *EMBO Rep* **6**: 1208–1213.
- 190 Gauthier, M.E.A., Du Pasquier, L., and Degnan, B.M. (2010) The genome of the sponge *Amphimedon queenslandica* provides new perspectives into the origin of Toll-like and interleukin 1 receptor pathways: The origin of Toll-like and IL1 receptor pathways. *Evol Dev* **12**: 519–533.
- 195 Herbold, C.W., Lehtovirta-Morley, L.E., Jung, M.-Y., Jehmlich, N., Hausmann, B., Han, P., *et al.* (2017) Ammonia-oxidising archaea living at low pH: Insights from comparative genomics: Comparative genomics of ammonia-oxidising archaea. *Environ Microbiol* **19**: 4939–4952.
- Hoffmann, F., Radax, R., Woebken, D., Holtappels, M., Lavik, G., Rapp, H.T., *et al.* (2009) Complex nitrogen cycling in the sponge *Geodia barretti*. *Environ Microbiol* **11**: 2228–2243.
- 200 Horn, H., Slaby, B.M., Jahn, M.T., Bayer, K., Moitinho-Silva, L., Förster, F., *et al.* (2016) An enrichment of CRISPR and other defense-related features in marine sponge-associated microbial metagenomes. *Front Microbiol* **7**: 1751.
- 205 Huerta-Cepas, J., Szklarczyk, D., Forslund, K., Cook, H., Heller, D., Walter, M.C., *et al.* (2016) eggNOG 4.5: a hierarchical orthology framework with improved functional annotations for eukaryotic, prokaryotic and viral sequences. *Nucleic Acids Res* **44**: D286–D293.
- Jiménez, E. and Ribes, M. (2007) Sponges as a source of dissolved inorganic nitrogen: Nitrification mediated by temperate sponges. *Limnol Oceanogr* **52**: 948–958.
- 210 Kalyaanamoorthy, S., Minh, B.Q., Wong, T.K.F., von Haeseler, A., and Jermiin, L.S. (2017) ModelFinder: fast model selection for accurate phylogenetic estimates. *Nat Methods* **14**: 587–589.
- Katoh, K. and Standley, D.M. (2013) MAFFT Multiple Sequence Alignment Software Version 7: Improvements in Performance and Usability. *Mol Biol Evol* **30**: 772–780.
- 215 Kerou, M., Offre, P., Valledor, L., Abby, S.S., Melcher, M., Nagler, M., *et al.* (2016) Proteomics and comparative genomics of *Nitrososphaera viennensis* reveal the core genome and adaptations of archaeal ammonia oxidizers. *Proc Natl Acad Sci USA* **113**: E7937–E7946.

- 220 Lagkouvardos, I., Joseph, D., Kapfhammer, M., Giritli, S., Horn, M., Haller, D., and Clavel, T. (2016) IMNGS: A comprehensive open resource of processed 16S rRNA microbial profiles for ecology and diversity studies. *Sci Rep-UK* **6**: 33721.
- Lassalle, F., Périan, S., Bataillon, T., Nesme, X., Duret, L., and Daubin, V. (2015) GC-Content evolution in bacterial genomes: the biased gene conversion hypothesis expands. *PLoS Genet* **11**: e1004941.
- 225 Laundon, D., Larson, B., McDonald, K., King, N., and Burkhardt, P. (2018) The architecture of cell differentiation in choanoflagellates and sponge choanocytes. *bioRxiv*.
- Li, P.-N., Herrmann, J., Tolar, B.B., Poitevin, F., Ramdasi, R., Bargar, J.R., *et al.* (2018) Nutrient transport suggests an evolutionary basis for charged archaeal surface layer proteins. *ISME J* **12**: 2389–2402.
- 230 Mah, J.L., Christensen-Dalsgaard, K.K., and Leys, S.P. (2014) Choanoflagellate and choanocyte collar-flagellar systems and the assumption of homology. *Evol Dev* **16**: 25–37.
- Maldonado, M. (2005) Choanoflagellates, choanocytes, and animal multicellularity. *Invertebr Biol* **123**: 1–22.
- Manning, G., Young, S.L., Miller, W.T., and Zhai, Y. (2008) The protist, *Monosiga brevicollis*, has a tyrosine kinase signaling network more elaborate and diverse than found in any  
235 known metazoan. *Proc Natl Acad Sci USA* **105**: 9674–9679.
- Moitinho-Silva, L., Díez-Vives, C., Batani, G., Esteves, A.I., Jahn, M.T., and Thomas, T. (2017) Integrated metabolism in sponge–microbe symbiosis revealed by genome-centered metatranscriptomics. *ISME J* **11**: 1651–1666.
- 240 Moitinho-Silva, L., Nielsen, S., Amir, A., Gonzalez, A., Ackermann, G.L., Cerrano, C., *et al.* (2017) The sponge microbiome project. *GigaScience* **6**: 1–7.
- Nguyen, L.-T., Schmidt, H.A., von Haeseler, A., and Minh, B.Q. (2015) IQ-TREE: a fast and effective stochastic algorithm for estimating maximum-likelihood phylogenies. *Mol Biol Evol* **32**: 268–274.
- 245 Palatinszky, M., Herbold, C., Jehmlich, N., Pogoda, M., Han, P., von Bergen, M., *et al.* (2015) Cyanate as an energy source for nitrifiers. *Nature* **524**: 105–108.
- Patterson, N.J., Günther, J., Gibson, A.J., Offord, V., Coffey, T.J., Splitter, G., *et al.* (2014) Two TIR-like domain containing proteins in a newly emerging zoonotic *Staphylococcus aureus* strain sequence type 398 are potential virulence factors by impacting on the host innate immune response. *Front Microbiol* **5**: 662.
- 250 Pruesse, E., Peplies, J., and Glöckner, F.O. (2012) SINA: Accurate high-throughput multiple sequence alignment of ribosomal RNA genes. *Bioinformatics* **28**: 1823–1829.



- Qin, W., Meinhardt, K.A., Moffett, J.W., Devol, A.H., Virginia Armbrust, E., Ingalls, A.E., and Stahl, D.A. (2017) Influence of oxygen availability on the activities of ammonia-oxidizing archaea. *Environ Microbiol Rep* **9**: 250–256.
- 255 Radax, R., Hoffmann, F., Rapp, H.T., Leininger, S., and Schleper, C. (2012) Ammonia-oxidizing archaea as main drivers of nitrification in cold-water sponges. *Environ Microbiol* **14**: 909–923.
- Reichenberger, E.R., Rosen, G., Hershberg, U., and Hershberg, R. (2015) Prokaryotic nucleotide composition is shaped by both phylogeny and the environment. *Genome Biol Evol* **7**: 1380–1389.
- 260 Reynolds, D. and Thomas, T. (2016) Evolution and function of eukaryotic-like proteins from sponge symbionts. *Mol Ecol* **25**: 5242–5253.
- Ribes, M., Jiménez, E., Yahel, G., López-Sendino, P., Diez, B., Massana, R., *et al.* (2012) Functional convergence of microbes associated with temperate marine sponges. *Environ Microbiol* **14**: 1224–1239.
- 265 Saier, M.H., Yen, M.R., Noto, K., Tamang, D.G., and Elkan, C. (2009) The Transporter Classification Database: recent advances. *Nucleic Acids Res* **37**: D274–D278.
- Santoro, A.E., Dupont, C.L., Richter, R.A., Craig, M.T., Carini, P., McIlvin, M.R., *et al.* (2015) Genomic and proteomic characterization of “*Candidatus Nitrosopelagicus brevis*”: An ammonia-oxidizing archaeon from the open ocean. *Proc Natl Acad Sci USA* **112**: 1173–1178.
- 270 Schläppy, M.-L., Schöttner, S.I., Lavik, G., Kuypers, M.M.M., de Beer, D., and Hoffmann, F. (2010) Evidence of nitrification and denitrification in high and low microbial abundance sponges. *Mar Biol* **157**: 593–602.
- 275 Shigeno-Nakazawa, Y., Kasai, T., Ki, S., Kostyanovskaya, E., Pawlak, J., Yamagishi, J., *et al.* (2016) A pre-metazoan origin of the CRK gene family and co-opted signaling network. *Sci Rep-UK* **6**: 3439.
- Southwell, M.W., Popp, B.N., and Martens, C.S. (2008) Nitrification controls on fluxes and isotopic composition of nitrate from Florida Keys sponges. *Mar Chem* **108**: 96–108.
- 280 Srivastava, M., Simakov, O., Chapman, J., Fahey, B., Gauthier, M.E.A., Mitros, T., *et al.* (2010) The *Amphimedon queenslandica* genome and the evolution of animal complexity. *Nature* **466**: 720–726.
- Stamatakis, A. (2014) RAxML version 8: a tool for phylogenetic analysis and post-analysis of large phylogenies. *Bioinformatics* **30**: 1312–1313.
- 285 Tian, R.-M., Sun, J., Cai, L., Zhang, W.-P., Zhou, G.-W., Qiu, J.-W., and Qian, P.-Y. (2016) The deep-sea glass sponge *Lophophysema eversa* harbours potential symbionts responsible

for the nutrient conversions of carbon, nitrogen and sulfur. *Environ Microbiol* **18**: 2481–2494.

290 Wang, H.-C., Susko, E., and Roger, A.J. (2006) On the correlation between genomic G+C content and optimal growth temperature in prokaryotes: Data quality and confounding factors. *Biochem Biophys Res Commun* **342**: 681–684.

Wiens, M., Korzhev, M., Perovic-Ottstadt, S., Luthringer, B., Brandt, D., Klein, S., and Muller, W.E.G. (2006) Toll-like receptors are part of the innate immune defense system of sponges (demospongiae: Porifera). *Mol Biol Evol* **24**: 792–804.

295 Wiens, M., Korzhev, M., Krasko, A., Thakur, N.L., Perović-Ottstadt, S., Breter, H.J., *et al.* (2005) Innate immune defense of the sponge *Suberites domuncula* against bacteria involves a MyD88-dependent signaling pathway: Induction of a perforin-like molecule. *J Biol Chem* **280**: 27949–27959.

300
